# Supplementary material for: Phenological and Geographical Effects on Phenolic and Triterpenoid Content in Vaccinium vitis-idaea L. Leaves
Source: MDPI journal article supplement (doi:10.3390/plants10101986), 2021-09-23
Supplement: s1 [file s1]

**Table S1.** Contents of simple phenolics and A-type proanthocyanidins ( $\mu\text{g/g DW} \pm \text{SD}$ ) in young and old lingonberry leaves, collected throughout one year.

| Date    | Arbutin               |                       | Hydroquinone      |                  | 2-O-Caffeoylarbutin |                    | Procyanidin A1      |                     | Procyanidin A2    |                    | Procyanidin A4   |                  |
|---------|-----------------------|-----------------------|-------------------|------------------|---------------------|--------------------|---------------------|---------------------|-------------------|--------------------|------------------|------------------|
|         | Young leaves          | Old leaves            | Young leaves      | Old leaves       | Young leaves        | Old leaves         | Young leaves        | Old leaves          | Young leaves      | Old leaves         | Young leaves     | Old leaves       |
| Jan. 11 | 64151.3 $\pm$ 1090.6* | 67158.7 $\pm$ 2552.0  | 22.5 $\pm$ 0.8    | 0.4 $\pm$ 0.0    | 3516.5 $\pm$ 42.2   | 2859.6 $\pm$ 108.7 | 7206.4 $\pm$ 158.5* | 5917.4 $\pm$ 59.2   | 987.7 $\pm$ 15.8* | 1310.4 $\pm$ 32.8* | 154.6 $\pm$ 8.0* | 136.1 $\pm$ 1.4* |
| Jan. 24 | 60261.1 $\pm$ 2531.0  | 67049.2 $\pm$ 2413.8  | 5.3 $\pm$ 0.2     | 2.9 $\pm$ 0.1    | 3510.2 $\pm$ 147.4  | 3079.4 $\pm$ 110.9 | 6449.7 $\pm$ 141.9  | 5666.3 $\pm$ 164.3  | 923.5 $\pm$ 30.5  | 964.6 $\pm$ 28.0   | 141.5 $\pm$ 3.1* | 88.7 $\pm$ 2.6   |
| Feb. 7  | 60655.6 $\pm$ 1941.0  | 68945.1 $\pm$ 1999.4  | 8.6 $\pm$ 0.3     | 5.3 $\pm$ 0.2    | 3373.3 $\pm$ 107.9  | 3260.7 $\pm$ 94.6* | 6344.5 $\pm$ 190.3  | 5601.1 $\pm$ 61.6   | 826.8 $\pm$ 27.3  | 988.7 $\pm$ 28.7   | 107.9 $\pm$ 3.2  | 88.8 $\pm$ 1.0   |
| Feb. 21 | 65851.7 $\pm$ 1909.7* | 62239.1 $\pm$ 2053.9  | 55.6 $\pm$ 2.2    | 15.2 $\pm$ 0.5   | 3587.6 $\pm$ 104.0  | 3069.7 $\pm$ 101.3 | 6381.4 $\pm$ 287.2  | 5505.1 $\pm$ 187.2  | 830.9 $\pm$ 24.1  | 1033.4 $\pm$ 34.1  | 98.7 $\pm$ 4.4   | 91.5 $\pm$ 3.1   |
| Mar. 7  | 59887.9 $\pm$ 2215.9  | 61940.2 $\pm$ 1114.9  | 29.8 $\pm$ 1.1    | 15.5 $\pm$ 0.3   | 3634.7 $\pm$ 134.5  | 2629.1 $\pm$ 23.7  | 5387.1 $\pm$ 188.5  | 3970.7 $\pm$ 87.4   | 849.6 $\pm$ 14.4  | 910.5 $\pm$ 16.4   | 98.9 $\pm$ 3.5   | 77.7 $\pm$ 1.7   |
| Mar. 21 | 62091.3 $\pm$ 1862.7  | 61380.8 $\pm$ 1534.5  | 41.7 $\pm$ 1.2    | 9.5 $\pm$ 0.2    | 3623.7 $\pm$ 108.7  | 2604.0 $\pm$ 65.1  | 5721.6 $\pm$ 206.0  | 4065.2 $\pm$ 182.9  | 853.4 $\pm$ 25.6  | 951.2 $\pm$ 23.8   | 99.8 $\pm$ 3.6   | 76.9 $\pm$ 3.5   |
| Apr. 4  | 60535.3 $\pm$ 1816.1  | 58170.2 $\pm$ 988.9   | 31.5 $\pm$ 0.9    | 15.1 $\pm$ 0.3   | 3600.1 $\pm$ 108.0  | 2608.4 $\pm$ 70.4  | 5398.5 $\pm$ 118.8  | 4137.1 $\pm$ 157.2  | 750.6 $\pm$ 22.5  | 941.6 $\pm$ 23.5   | 79.9 $\pm$ 2.6   | 67.2 $\pm$ 2.6   |
| Apr. 17 | 58508.5 $\pm$ 1462.7  | 62416.8 $\pm$ 1872.5  | 17.0 $\pm$ 0.4    | 8.4 $\pm$ 0.3    | 3618.6 $\pm$ 90.5   | 2669.1 $\pm$ 80.1  | 4631.0 $\pm$ 194.5  | 4355.2 $\pm$ 156.8  | 729.9 $\pm$ 7.3   | 951.4 $\pm$ 16.2   | 85.0 $\pm$ 3.6   | 78.5 $\pm$ 2.8   |
| May 1   | 22669.7 $\pm$ 430.7   | 61517.3 $\pm$ 1845.5  | 2.8 $\pm$ 0.1     | 9.2 $\pm$ 0.3    | 3293.5 $\pm$ 72.5   | 2261.9 $\pm$ 13.6  | 2040.4 $\pm$ 65.3   | 4172.3 $\pm$ 121.0  | 366.8 $\pm$ 9.2   | 1006.2 $\pm$ 30.2  | 15.7 $\pm$ 0.5   | 86.9 $\pm$ 2.5   |
| May 15  | 26987.7 $\pm$ 593.7   | 60209.7 $\pm$ 1746.1  | 16.0 $\pm$ 0.4    | 10.4 $\pm$ 0.2   | 3569.3 $\pm$ 78.5   | 2343.1 $\pm$ 67.9  | 2164.6 $\pm$ 41.1   | 4158.9 $\pm$ 95.7   | 416.6 $\pm$ 7.9   | 1049.4 $\pm$ 31.5  | 20.9 $\pm$ 0.4   | 90.2 $\pm$ 3.0   |
| May 29  | 28991.5 $\pm$ 869.7   | 60189.2 $\pm$ 1986.2  | 169.6 $\pm$ 5.9   | 115.6 $\pm$ 3.5  | 3836.0 $\pm$ 115.1  | 1933.9 $\pm$ 44.5  | 1950.8 $\pm$ 60.5   | 4302.3 $\pm$ 94.7   | 402.9 $\pm$ 10.1  | 1086.5 $\pm$ 25.0  | 19.7 $\pm$ 0.6   | 84.0 $\pm$ 1.8   |
| Jun. 13 | 29163.1 $\pm$ 904.1   | 63852.9 $\pm$ 2873.4  | 434.8 $\pm$ 17.8* | 154.9 $\pm$ 7.0  | 4158.3 $\pm$ 128.9  | 2333.4 $\pm$ 105.0 | 2005.4 $\pm$ 20.1   | 4133.1 $\pm$ 103.3  | 457.0 $\pm$ 5.0   | 1132.1 $\pm$ 53.2  | 22.5 $\pm$ 0.2   | 86.4 $\pm$ 3.0   |
| Jun. 28 | 30708.5 $\pm$ 1044.1  | 62728.7 $\pm$ 2195.5  | 372.8 $\pm$ 12.7  | 144.0 $\pm$ 5.0  | 4267.4 $\pm$ 145.1  | 2434.9 $\pm$ 85.2  | 2043.9 $\pm$ 45.0   | 4277.1 $\pm$ 141.1  | 305.4 $\pm$ 10.4  | 1079.0 $\pm$ 18.3  | 21.5 $\pm$ 0.5   | 86.8 $\pm$ 3.7   |
| Jul. 15 | 34773.3 $\pm$ 973.7   | 63875.4 $\pm$ 2235.6  | 370.7 $\pm$ 10.4  | 129.6 $\pm$ 4.5  | 4602.9 $\pm$ 197.9  | 2511.9 $\pm$ 105.5 | 2104.7 $\pm$ 71.6   | 4397.5 $\pm$ 70.4   | 386.5 $\pm$ 7.0   | 1090.5 $\pm$ 16.4  | 29.2 $\pm$ 1.0   | 81.7 $\pm$ 2.1   |
| Jul. 29 | 35342.4 $\pm$ 565.5   | 65875.5 $\pm$ 1778.6  | 368.6 $\pm$ 9.6   | 150.2 $\pm$ 4.1  | 4646.7 $\pm$ 199.8  | 2728.9 $\pm$ 87.3  | 2160.3 $\pm$ 23.8   | 4384.1 $\pm$ 65.8   | 367.2 $\pm$ 10.7  | 1117.8 $\pm$ 33.5  | 28.3 $\pm$ 0.3   | 85.3 $\pm$ 1.3   |
| Aug. 11 | 41493.8 $\pm$ 1286.3  | 64573.3 $\pm$ 2324.6  | 371.8 $\pm$ 11.5  | 143.6 $\pm$ 5.2  | 5045.3 $\pm$ 196.8  | 2665.5 $\pm$ 96.0  | 3777.7 $\pm$ 117.1  | 4455.8 $\pm$ 187.1  | 484.1 $\pm$ 12.1  | 1137.7 $\pm$ 26.2  | 28.6 $\pm$ 0.9   | 80.1 $\pm$ 3.4   |
| Aug. 24 | 41701.9 $\pm$ 625.5   | 72877.4 $\pm$ 2405.0* | 384.4 $\pm$ 5.8   | 174.3 $\pm$ 5.8  | 5724.7 $\pm$ 143.1* | 2659.6 $\pm$ 87.8  | 4059.4 $\pm$ 105.5  | 4461.6 $\pm$ 142.8  | 448.6 $\pm$ 6.7   | 1032.6 $\pm$ 16.5  | 32.1 $\pm$ 0.8   | 84.0 $\pm$ 2.7   |
| Sep. 6  | 55664.9 $\pm$ 1391.6  | 71075.8 $\pm$ 2132.3* | 286.6 $\pm$ 7.2   | 177.3 $\pm$ 5.3  | 4747.6 $\pm$ 118.7  | 2822.3 $\pm$ 84.7  | 4715.0 $\pm$ 89.6   | 4954.8 $\pm$ 143.7  | 474.3 $\pm$ 16.6  | 1058.9 $\pm$ 22.2  | 35.5 $\pm$ 0.7   | 79.3 $\pm$ 2.0   |
| Sep. 20 | 66370.7 $\pm$ 1858.4* | 71798.8 $\pm$ 3015.5* | 277.6 $\pm$ 7.8   | 191.6 $\pm$ 8.0* | 4474.0 $\pm$ 125.3  | 2891.0 $\pm$ 121.4 | 4998.0 $\pm$ 115.0  | 4744.3 $\pm$ 128.1  | 591.0 $\pm$ 17.1  | 1082.7 $\pm$ 34.6  | 87.7 $\pm$ 2.0   | 88.5 $\pm$ 3.3   |
| Oct. 4  | 64099.5 $\pm$ 1025.6* | 71628.9 $\pm$ 1934.0* | 222.0 $\pm$ 3.6   | 89.4 $\pm$ 2.4   | 3956.3 $\pm$ 63.3   | 2794.8 $\pm$ 75.5  | 5014.2 $\pm$ 90.3   | 4895.6 $\pm$ 122.4  | 591.3 $\pm$ 9.5   | 1160.0 $\pm$ 44.1  | 87.7 $\pm$ 1.6   | 91.7 $\pm$ 2.3   |
| Oct. 19 | 63837.3 $\pm$ 1979.0* | 71893.0 $\pm$ 2588.1* | 225.3 $\pm$ 7.0   | 39.4 $\pm$ 1.8   | 4066.1 $\pm$ 126.0  | 2756.9 $\pm$ 71.7  | 5829.2 $\pm$ 180.7  | 5042.6 $\pm$ 95.8   | 815.5 $\pm$ 34.3  | 1071.0 $\pm$ 46.1  | 96.5 $\pm$ 2.0   | 87.1 $\pm$ 1.7   |
| Nov. 1  | 70777.2 $\pm$ 1061.7* | 73650.4 $\pm$ 2430.5* | 54.7 $\pm$ 2.5    | 13.2 $\pm$ 0.4   | 4058.0 $\pm$ 60.9   | 2803.6 $\pm$ 92.5  | 6189.3 $\pm$ 185.7  | 5087.3 $\pm$ 127.2  | 815.3 $\pm$ 26.1  | 1077.9 $\pm$ 42.0  | 106.6 $\pm$ 3.2  | 88.1 $\pm$ 2.2   |
| Nov. 16 | 72168.0 $\pm$ 1371.2* | 69164.0 $\pm$ 2282.4* | 60.5 $\pm$ 3.0    | 14.6 $\pm$ 0.6   | 4056.7 $\pm$ 77.1   | 2899.7 $\pm$ 95.7  | 6465.3 $\pm$ 148.7  | 5071.5 $\pm$ 177.5  | 918.9 $\pm$ 26.6  | 1181.8 $\pm$ 39.0  | 116.3 $\pm$ 2.7  | 94.4 $\pm$ 1.4   |
| Nov. 29 | 67706.9 $\pm$ 2843.7* | 69502.0 $\pm$ 2988.6* | 23.2 $\pm$ 1.0    | 8.2 $\pm$ 0.4    | 3907.3 $\pm$ 164.1  | 2959.6 $\pm$ 127.3 | 6286.0 $\pm$ 276.6  | 6298.7 $\pm$ 69.3*  | 910.5 $\pm$ 15.5  | 1408.8 $\pm$ 49.3* | 115.0 $\pm$ 5.1  | 132.7 $\pm$ 1.5* |
| Dec. 13 | 66027.7 $\pm$ 2112.9* | 67314.7 $\pm$ 1952.1  | 20.1 $\pm$ 0.6    | 3.0 $\pm$ 0.1    | 3969.1 $\pm$ 127.0  | 2868.2 $\pm$ 83.2  | 6673.4 $\pm$ 233.6  | 6048.8 $\pm$ 163.3* | 992.4 $\pm$ 11.9* | 1394.5 $\pm$ 54.4* | 117.2 $\pm$ 1.8  | 137.0 $\pm$ 3.7* |
| Dec. 28 | 69436.7 $\pm$ 2013.7* | 68303.3 $\pm$ 2254.0  | 20.7 $\pm$ 0.6    | 3.2 $\pm$ 0.1    | 3636.1 $\pm$ 105.4  | 2886.1 $\pm$ 95.2  | 6713.8 $\pm$ 235.0  | 6160.4 $\pm$ 184.8* | 961.1 $\pm$ 27.9* | 1385.7 $\pm$ 47.1* | 122.5 $\pm$ 3.1  | 135.9 $\pm$ 4.1* |

Results are presented as means  $\pm$  SD of the samples collected at different dates in a certain forest plot. Values marked with \* in the same column indicate the highest ( $p < 0.05$ ) amounts in samples.

**Table S2.** Contents of catechins and B-type proanthocyanidins ( $\mu\text{g/g DW} \pm \text{SD}$ ) in young and old lingonberry leaves, collected throughout one year.

| Date    | (+)-Catechin         |                      | (-)-Epicatechin    |                     | Procyanidin B1      |                     | Procyanidin B2      |                     | Procyanidin B3      |                     | Procyanidin C1      |                     |
|---------|----------------------|----------------------|--------------------|---------------------|---------------------|---------------------|---------------------|---------------------|---------------------|---------------------|---------------------|---------------------|
|         | Young leaves         | Old leaves           | Young leaves       | Old leaves          | Young leaves        | Old leaves          | Young leaves        | Old leaves          | Young leaves        | Old leaves          | Young leaves        | Old leaves          |
| Jan. 11 | 16561.6 $\pm$ 281.6* | 14760.7 $\pm$ 560.9* | 2616.7 $\pm$ 44.5  | 2938.0 $\pm$ 111.5  | 6336.9 $\pm$ 190.1* | 5351.9 $\pm$ 133.8  | 2595.4 $\pm$ 44.1*  | 3532.9 $\pm$ 63.6   | 9594.8 $\pm$ 163.1* | 7680.5 $\pm$ 291.9  | 4782.1 $\pm$ 81.3*  | 4584.4 $\pm$ 128.4  |
| Jan. 24 | 15309.4 $\pm$ 643.0  | 12113.6 $\pm$ 436.1  | 2442.3 $\pm$ 102.6 | 1813.6 $\pm$ 65.3   | 5462.5 $\pm$ 125.6  | 4258.1 $\pm$ 149.0  | 2290.8 $\pm$ 96.2   | 2828.6 $\pm$ 101.8  | 7926.0 $\pm$ 332.9  | 6194.1 $\pm$ 223.0  | 4050.4 $\pm$ 170.1  | 3997.6 $\pm$ 143.9  |
| Feb. 7  | 15108.0 $\pm$ 483.5  | 13672.3 $\pm$ 533.2  | 2167.0 $\pm$ 69.3  | 1823.6 $\pm$ 71.1   | 5374.7 $\pm$ 236.5  | 3964.6 $\pm$ 43.6   | 2169.6 $\pm$ 69.4   | 2757.8 $\pm$ 80.0   | 8018.2 $\pm$ 256.6  | 6456.5 $\pm$ 187.2  | 4077.1 $\pm$ 130.5  | 3836.6 $\pm$ 149.6  |
| Feb. 21 | 15009.6 $\pm$ 435.3  | 13210.1 $\pm$ 435.9  | 2097.4 $\pm$ 60.8  | 1959.1 $\pm$ 64.7   | 5358.7 $\pm$ 241.1  | 3981.7 $\pm$ 135.4  | 2201.8 $\pm$ 63.9   | 2824.2 $\pm$ 93.2   | 7715.7 $\pm$ 146.6  | 6436.4 $\pm$ 212.4  | 4201.1 $\pm$ 121.8  | 3778.2 $\pm$ 124.7  |
| Mar. 7  | 15105.9 $\pm$ 558.9  | 10307.0 $\pm$ 185.5  | 2097.6 $\pm$ 77.6  | 1990.6 $\pm$ 35.8   | 5045.5 $\pm$ 176.6  | 4028.2 $\pm$ 88.6   | 2200.9 $\pm$ 81.4   | 2769.1 $\pm$ 49.8   | 6386.7 $\pm$ 236.3  | 4753.4 $\pm$ 85.6   | 4022.8 $\pm$ 148.8  | 3750.7 $\pm$ 67.5   |
| Mar. 21 | 15097.3 $\pm$ 452.9  | 10198.3 $\pm$ 255.0  | 2172.3 $\pm$ 65.2  | 2020.4 $\pm$ 50.5   | 5080.7 $\pm$ 182.9  | 4693.1 $\pm$ 211.2  | 2138.9 $\pm$ 64.2   | 2813.3 $\pm$ 70.3   | 6257.1 $\pm$ 187.7  | 4819.7 $\pm$ 120.5  | 3920.0 $\pm$ 117.6  | 3472.1 $\pm$ 121.5  |
| Apr. 4  | 13346.1 $\pm$ 440.4  | 10480.2 $\pm$ 199.1  | 2167.8 $\pm$ 65.0  | 2085.0 $\pm$ 52.1   | 4974.1 $\pm$ 109.4  | 4749.5 $\pm$ 180.5  | 2164.2 $\pm$ 64.9   | 2753.9 $\pm$ 68.8   | 6486.3 $\pm$ 214.0  | 5462.4 $\pm$ 103.8  | 3954.4 $\pm$ 87.0   | 3674.3 $\pm$ 95.5   |
| Apr. 17 | 13330.1 $\pm$ 439.9  | 12884.8 $\pm$ 541.2  | 1707.4 $\pm$ 51.2  | 2208.2 $\pm$ 37.5   | 4755.8 $\pm$ 199.7  | 4614.4 $\pm$ 166.1  | 2079.4 $\pm$ 62.4   | 3202.8 $\pm$ 54.4   | 5693.5 $\pm$ 187.9  | 6197.6 $\pm$ 260.3  | 3790.8 $\pm$ 113.7  | 4010.1 $\pm$ 68.2   |
| May 1   | 11273.5 $\pm$ 484.8  | 11386.4 $\pm$ 250.5  | 796.7 $\pm$ 19.9   | 2277.3 $\pm$ 68.3   | 2044.2 $\pm$ 65.4   | 4532.6 $\pm$ 86.1   | 1047.3 $\pm$ 26.2   | 3139.1 $\pm$ 94.2   | 2919.6 $\pm$ 125.5  | 5754.7 $\pm$ 126.6  | 1477.8 $\pm$ 37.0   | 2897.8 $\pm$ 86.9   |
| May 15  | 11280.3 $\pm$ 248.2  | 11356.0 $\pm$ 329.3  | 1062.5 $\pm$ 20.2  | 2303.7 $\pm$ 69.1   | 1728.8 $\pm$ 50.1   | 4815.4 $\pm$ 158.9  | 864.3 $\pm$ 16.4    | 3066.7 $\pm$ 92.0   | 2915.5 $\pm$ 64.1   | 5664.8 $\pm$ 220.9  | 1934.1 $\pm$ 36.8   | 3195.0 $\pm$ 47.9   |
| May 29  | 4043.9 $\pm$ 121.3   | 7118.8 $\pm$ 163.7   | 1086.1 $\pm$ 27.2  | 2313.9 $\pm$ 53.2   | 1889.0 $\pm$ 69.9   | 4712.8 $\pm$ 160.2  | 900.6 $\pm$ 22.5    | 3074.9 $\pm$ 70.7   | 3065.2 $\pm$ 92.0   | 5787.1 $\pm$ 133.1  | 2162.8 $\pm$ 75.7   | 3415.5 $\pm$ 95.6   |
| Jun. 13 | 2329.2 $\pm$ 72.2    | 8407.1 $\pm$ 378.3   | 1062.1 $\pm$ 32.9  | 2339.4 $\pm$ 110.0  | 972.7 $\pm$ 15.6    | 4816.5 $\pm$ 53.0   | 659.7 $\pm$ 7.3     | 3060.8 $\pm$ 143.9  | 1591.9 $\pm$ 49.3   | 5676.1 $\pm$ 255.4  | 2634.5 $\pm$ 39.5   | 3525.6 $\pm$ 102.2  |
| Jun. 28 | 2094.5 $\pm$ 71.2    | 8347.9 $\pm$ 308.9   | 1010.8 $\pm$ 34.4  | 2288.0 $\pm$ 84.7   | 998.3 $\pm$ 15.0    | 4683.5 $\pm$ 145.2  | 765.3 $\pm$ 26.0    | 3126.3 $\pm$ 53.1   | 1055.6 $\pm$ 35.9   | 5496.5 $\pm$ 148.4  | 2635.6 $\pm$ 29.0   | 3771.9 $\pm$ 94.3   |
| Jul. 15 | 3072.1 $\pm$ 86.0    | 7213.5 $\pm$ 180.3   | 1051.3 $\pm$ 29.4  | 2161.7 $\pm$ 54.0   | 1492.3 $\pm$ 32.8   | 4817.5 $\pm$ 144.5  | 1116.4 $\pm$ 31.3   | 3168.3 $\pm$ 79.2   | 1276.4 $\pm$ 35.7   | 5779.7 $\pm$ 86.7   | 2787.4 $\pm$ 64.1   | 3867.1 $\pm$ 120.0  |
| Jul. 29 | 2952.0 $\pm$ 47.2    | 6926.5 $\pm$ 187.0   | 1060.6 $\pm$ 30.7  | 2135.2 $\pm$ 64.1   | 1497.9 $\pm$ 67.4   | 4607.9 $\pm$ 101.4  | 1125.3 $\pm$ 32.6   | 2970.3 $\pm$ 89.1   | 1407.1 $\pm$ 22.5   | 5874.6 $\pm$ 158.6  | 3012.7 $\pm$ 141.6  | 3943.5 $\pm$ 134.1  |
| Aug. 11 | 3238.9 $\pm$ 100.4   | 6889.2 $\pm$ 248.0   | 1053.7 $\pm$ 26.3  | 2140.3 $\pm$ 49.2   | 3190.7 $\pm$ 121.2  | 4560.0 $\pm$ 191.5  | 1393.3 $\pm$ 34.8   | 3015.8 $\pm$ 69.4   | 2766.3 $\pm$ 85.8   | 5917.9 $\pm$ 213.0  | 3210.8 $\pm$ 54.6   | 4125.4 $\pm$ 94.9   |
| Aug. 24 | 4521.5 $\pm$ 67.8    | 9091.1 $\pm$ 327.3   | 1205.9 $\pm$ 18.1  | 2190.3 $\pm$ 78.9   | 3810.7 $\pm$ 99.1   | 4479.9 $\pm$ 143.4  | 1384.6 $\pm$ 20.8   | 3074.8 $\pm$ 49.2   | 4764.9 $\pm$ 71.5   | 6135.4 $\pm$ 220.9  | 3672.6 $\pm$ 55.1   | 3953.7 $\pm$ 142.3  |
| Sep. 6  | 8525.8 $\pm$ 298.4   | 11284.9 $\pm$ 338.5  | 1271.5 $\pm$ 44.5  | 2275.1 $\pm$ 68.3   | 4196.5 $\pm$ 79.7   | 4370.8 $\pm$ 126.8  | 1459.3 $\pm$ 51.1   | 3352.2 $\pm$ 70.4   | 5171.7 $\pm$ 181.0  | 6489.6 $\pm$ 194.7  | 4070.7 $\pm$ 142.5  | 4321.3 $\pm$ 129.6  |
| Sep. 20 | 13126.1 $\pm$ 367.5  | 11414.7 $\pm$ 479.4  | 1773.5 $\pm$ 51.4  | 2375.0 $\pm$ 99.8   | 5056.2 $\pm$ 116.3  | 4450.3 $\pm$ 164.7  | 1708.7 $\pm$ 49.6   | 3311.1 $\pm$ 139.1  | 6758.1 $\pm$ 121.6  | 6518.9 $\pm$ 273.8  | 4505.9 $\pm$ 130.7  | 4293.4 $\pm$ 128.8  |
| Oct. 4  | 13877.8 $\pm$ 222.0  | 14155.1 $\pm$ 523.7  | 1755.7 $\pm$ 28.1  | 2747.1 $\pm$ 101.6  | 5301.2 $\pm$ 95.4   | 6260.1 $\pm$ 156.5  | 1671.4 $\pm$ 26.7   | 3605.0 $\pm$ 133.4  | 6763.8 $\pm$ 108.2  | 6606.3 $\pm$ 244.4  | 4492.3 $\pm$ 71.9   | 4478.1 $\pm$ 120.9  |
| Oct. 19 | 15313.4 $\pm$ 520.7  | 12931.9 $\pm$ 465.6  | 2495.2 $\pm$ 84.8  | 2703.1 $\pm$ 97.3   | 5289.0 $\pm$ 158.7  | 4345.7 $\pm$ 117.3  | 2264.0 $\pm$ 77.0   | 3545.4 $\pm$ 127.6  | 7901.5 $\pm$ 268.7  | 6649.6 $\pm$ 239.4  | 4646.9 $\pm$ 58.0   | 4433.6 $\pm$ 159.6  |
| Nov. 1  | 15938.9 $\pm$ 239.1  | 13411.6 $\pm$ 442.6  | 2578.5 $\pm$ 38.7  | 2757.7 $\pm$ 91.0   | 5404.1 $\pm$ 135.1  | 5285.0 $\pm$ 158.6  | 2317.9 $\pm$ 34.8   | 3506.0 $\pm$ 115.7  | 8522.8 $\pm$ 127.8  | 7109.4 $\pm$ 234.6  | 4573.1 $\pm$ 68.6   | 4539.1 $\pm$ 149.8  |
| Nov. 16 | 16154.6 $\pm$ 468.5* | 13917.0 $\pm$ 459.3  | 2870.0 $\pm$ 83.2  | 2778.3 $\pm$ 91.7   | 6140.7 $\pm$ 135.1  | 5351.3 $\pm$ 32.1   | 2599.3 $\pm$ 75.4*  | 3737.8 $\pm$ 123.3* | 8632.0 $\pm$ 250.3  | 7314.8 $\pm$ 241.4  | 4713.5 $\pm$ 96.7*  | 4800.3 $\pm$ 158.4  |
| Nov. 29 | 16110.9 $\pm$ 676.7* | 15211.5 $\pm$ 654.1* | 2931.3 $\pm$ 99.1* | 3441.6 $\pm$ 148.0* | 5557.6 $\pm$ 122.3  | 6733.8 $\pm$ 195.3* | 2634.9 $\pm$ 110.7* | 3998.4 $\pm$ 171.9* | 8394.2 $\pm$ 352.6  | 8357.4 $\pm$ 359.4* | 4793.9 $\pm$ 201.3* | 5016.6 $\pm$ 215.7* |
| Dec. 13 | 16211.4 $\pm$ 518.8* | 13869.0 $\pm$ 540.9  | 3014.1 $\pm$ 96.5* | 3029.6 $\pm$ 118.2  | 6067.9 $\pm$ 182.0  | 6259.7 $\pm$ 156.5  | 2642.3 $\pm$ 84.6*  | 3801.2 $\pm$ 148.2* | 8542.4 $\pm$ 273.4  | 8250.6 $\pm$ 321.8* | 4960.2 $\pm$ 158.7* | 5004.7 $\pm$ 195.2* |
| Dec. 28 | 16248.8 $\pm$ 471.2* | 14483.2 $\pm$ 477.9* | 2759.5 $\pm$ 80.0  | 3041.7 $\pm$ 130.8  | 6435.9 $\pm$ 135.2* | 5499.2 $\pm$ 104.5  | 2646.7 $\pm$ 76.8*  | 3805.1 $\pm$ 163.6* | 9112.6 $\pm$ 264.3  | 8059.2 $\pm$ 266.0  | 4886.4 $\pm$ 117.3* | 4804.1 $\pm$ 62.5   |

Results are presented as means  $\pm$  SD of the samples collected at different dates in a certain forest plot. Values marked with \* in the same column indicate the highest ( $p < 0.05$ ) amounts in samples.

**Table S3.** Contents of flavonol aglycones and phenolic acids ( $\mu\text{g/g DW} \pm \text{SD}$ ) in young and old lingonberry leaves, collected throughout one year.

| Date    | Quercetin        |                 | Kaempferol      |                | Chlorogenic acid  |                   | Cryptochlorogenic acid |                   | Neochlorogenic acid |                 | <i>p</i> -Coumaric acid |                  |
|---------|------------------|-----------------|-----------------|----------------|-------------------|-------------------|------------------------|-------------------|---------------------|-----------------|-------------------------|------------------|
|         | Young leaves     | Old leaves      | Young leaves    | Old leaves     | Young leaves      | Old leaves        | Young leaves           | Old leaves        | Young leaves        | Old leaves      | Young leaves            | Old leaves       |
| Jan. 11 | 68.8 $\pm$ 1.9   | 61.9 $\pm$ 1.7  | NQ              | NQ             | 495.5 $\pm$ 8.4   | 531.8 $\pm$ 9.6   | 1166.5 $\pm$ 18.7      | 811.8 $\pm$ 12.2  | 59.7 $\pm$ 0.7      | 80.9 $\pm$ 3.1  | 308.4 $\pm$ 5.2         | 171.8 $\pm$ 2.1  |
| Jan. 24 | 71.5 $\pm$ 3.0   | 70.4 $\pm$ 2.5  | NQ              | NQ             | 490.5 $\pm$ 5.9   | 530.3 $\pm$ 13.8  | 1102.8 $\pm$ 36.4      | 772.3 $\pm$ 22.4  | 61.5 $\pm$ 2.6      | 77.6 $\pm$ 2.8  | 277.7 $\pm$ 12.5        | 177.7 $\pm$ 6.4  |
| Feb. 7  | 70.8 $\pm$ 2.3   | 67.1 $\pm$ 2.6  | NQ              | NQ             | 541.5 $\pm$ 11.9  | 513.5 $\pm$ 14.9  | 1020.4 $\pm$ 43.9      | 793.9 $\pm$ 23.0  | 71.0 $\pm$ 1.6*     | 67.9 $\pm$ 0.6  | 294.7 $\pm$ 12.4        | 179.9 $\pm$ 5.2  |
| Feb. 21 | 71.1 $\pm$ 2.8   | 69.7 $\pm$ 1.6  | NQ              | NQ             | 546.6 $\pm$ 10.4  | 446.1 $\pm$ 5.8   | 999.8 $\pm$ 39.0       | 779.2 $\pm$ 17.9  | 59.5 $\pm$ 1.7      | 62.4 $\pm$ 2.1  | 323.9 $\pm$ 12.6        | 177.9 $\pm$ 4.1  |
| Mar. 7  | 72.3 $\pm$ 2.7   | 67.7 $\pm$ 1.2  | NQ              | NQ             | 463.7 $\pm$ 7.9   | 474.4 $\pm$ 13.3  | 883.3 $\pm$ 15.0       | 678.2 $\pm$ 12.2  | 52.0 $\pm$ 1.9      | 62.3 $\pm$ 0.6  | 325.7 $\pm$ 12.1        | 187.3 $\pm$ 3.4  |
| Mar. 21 | 67.3 $\pm$ 2.0   | 67.3 $\pm$ 1.7  | NQ              | NQ             | 682.5 $\pm$ 14.3  | 448.2 $\pm$ 15.7  | 896.9 $\pm$ 26.9       | 677.0 $\pm$ 16.9  | 48.6 $\pm$ 1.5      | 68.7 $\pm$ 1.7  | 332.2 $\pm$ 11.3        | 165.7 $\pm$ 2.5  |
| Apr. 4  | 68.3 $\pm$ 2.3   | 66.7 $\pm$ 1.3  | NQ              | NQ             | 393.1 $\pm$ 5.1   | 424.7 $\pm$ 8.1   | 531.7 $\pm$ 11.7       | 651.6 $\pm$ 16.3  | 48.8 $\pm$ 1.5      | 73.0 $\pm$ 2.0  | 277.3 $\pm$ 11.6        | 156.3 $\pm$ 3.9  |
| Apr. 17 | 66.6 $\pm$ 2.2   | 67.9 $\pm$ 2.8  | NQ              | NQ             | 234.1 $\pm$ 5.4   | 419.4 $\pm$ 13.4  | 545.6 $\pm$ 12.0       | 661.8 $\pm$ 11.3  | 35.1 $\pm$ 0.9      | 74.5 $\pm$ 2.2  | 149.9 $\pm$ 4.5         | 122.6 $\pm$ 2.1  |
| May 1   | 59.1 $\pm$ 0.8   | 65.8 $\pm$ 2.1  | 3.5 $\pm$ 0.1   | NQ             | 217.1 $\pm$ 5.0   | 394.4 $\pm$ 16.6  | 433.8 $\pm$ 11.3       | 628.1 $\pm$ 15.7  | 35.6 $\pm$ 0.8      | 76.1 $\pm$ 1.2  | 107.2 $\pm$ 1.6         | 147.3 $\pm$ 6.0  |
| May 15  | 67.3 $\pm$ 1.5   | 68.5 $\pm$ 1.3  | 3.6 $\pm$ 0.1   | NQ             | 355.1 $\pm$ 7.8   | 391.6 $\pm$ 15.3  | 791.1 $\pm$ 14.2       | 632.0 $\pm$ 9.5   | 42.1 $\pm$ 0.9      | 80.6 $\pm$ 2.3  | 203.1 $\pm$ 3.7         | 190.7 $\pm$ 2.9  |
| May 29  | 72.2 $\pm$ 2.2   | 69.9 $\pm$ 1.6  | 4.0 $\pm$ 0.1   | 3.7 $\pm$ 0.1  | 416.2 $\pm$ 12.5  | 399.8 $\pm$ 9.2   | 872.1 $\pm$ 34.0       | 613.6 $\pm$ 18.4  | 45.0 $\pm$ 0.9      | 80.6 $\pm$ 1.9  | 303.1 $\pm$ 11.5        | 182.9 $\pm$ 6.4  |
| Jun. 13 | 100.2 $\pm$ 4.1  | 80.4 $\pm$ 2.0  | 10.3 $\pm$ 0.2* | 4.2 $\pm$ 0.1* | 765.5 $\pm$ 23.7  | 460.3 $\pm$ 11.5  | 1143.6 $\pm$ 40.0      | 697.3 $\pm$ 23.0  | 44.7 $\pm$ 1.4      | 80.3 $\pm$ 3.6  | 701.7 $\pm$ 17.4*       | 215.6 $\pm$ 4.5  |
| Jun. 28 | 161.6 $\pm$ 7.1* | 82.5 $\pm$ 2.2  | 13.1 $\pm$ 0.4* | 4.3 $\pm$ 0.1* | 714.7 $\pm$ 30.0  | 544.9 $\pm$ 14.7  | 1131.8 $\pm$ 39.6      | 694.1 $\pm$ 25.0  | 46.8 $\pm$ 1.6      | 79.2 $\pm$ 2.7  | 614.3 $\pm$ 9.2         | 229.3 $\pm$ 3.0  |
| Jul. 15 | 130.5 $\pm$ 3.7  | 94.7 $\pm$ 1.4* | 4.6 $\pm$ 0.2   | 4.4 $\pm$ 0.1* | 797.9 $\pm$ 30.3* | 478.7 $\pm$ 7.2   | 1277.7 $\pm$ 17.1*     | 713.6 $\pm$ 15.7  | 50.2 $\pm$ 2.2      | 82.7 $\pm$ 3.5  | 579.5 $\pm$ 8.7         | 231.0 $\pm$ 2.8  |
| Jul. 29 | 132.5 $\pm$ 2.1  | 90.3 $\pm$ 2.4* | 4.6 $\pm$ 0.1   | 4.4 $\pm$ 0.1* | 782.2 $\pm$ 20.3* | 526.7 $\pm$ 9.0   | 1266.3 $\pm$ 44.3*     | 720.4 $\pm$ 16.6  | 50.3 $\pm$ 0.7      | 80.3 $\pm$ 2.6  | 611.0 $\pm$ 21.4        | 239.6 $\pm$ 7.2  |
| Aug. 11 | 126.6 $\pm$ 5.2  | 87.8 $\pm$ 2.3* | 4.8 $\pm$ 0.2   | 4.1 $\pm$ 0.1  | 797.1 $\pm$ 24.7* | 597.6 $\pm$ 15.5  | 1275.6 $\pm$ 39.5*     | 767.7 $\pm$ 20.7  | 55.6 $\pm$ 2.2      | 78.1 $\pm$ 2.8  | 599.6 $\pm$ 10.2        | 238.1 $\pm$ 3.6  |
| Aug. 24 | 117.8 $\pm$ 4.1  | 88.9 $\pm$ 2.3* | 4.8 $\pm$ 0.2   | 4.1 $\pm$ 0.1  | 809.7 $\pm$ 36.4* | 579.7 $\pm$ 15.1  | 1338.9 $\pm$ 45.5*     | 835.9 $\pm$ 30.9  | 51.7 $\pm$ 1.3      | 73.1 $\pm$ 2.4  | 651.1 $\pm$ 22.7        | 220.9 $\pm$ 5.7  |
| Sep. 6  | 107.4 $\pm$ 3.8  | 92.6 $\pm$ 2.8* | 4.7 $\pm$ 0.2   | 4.0 $\pm$ 0.1  | 814.7 $\pm$ 28.5* | 599.7 $\pm$ 12.6  | 1329.4 $\pm$ 46.5*     | 871.9 $\pm$ 18.3  | 55.7 $\pm$ 1.4      | 75.7 $\pm$ 2.3  | 533.1 $\pm$ 20.3        | 257.9 $\pm$ 3.1  |
| Sep. 20 | 93.4 $\pm$ 3.5   | 79.7 $\pm$ 2.5  | 4.2 $\pm$ 0.1   | 4.1 $\pm$ 0.1  | 787.4 $\pm$ 14.2* | 584.6 $\pm$ 24.6  | 1330.0 $\pm$ 38.6*     | 893.4 $\pm$ 28.6  | 57.1 $\pm$ 1.6      | 79.3 $\pm$ 3.3  | 499.5 $\pm$ 14.5        | 239.2 $\pm$ 5.3  |
| Oct. 4  | 83.6 $\pm$ 1.3   | 73.5 $\pm$ 2.7  | 3.9 $\pm$ 0.1   | 4.2 $\pm$ 0.2* | 733.1 $\pm$ 19.1  | 670.7 $\pm$ 18.1* | 1308.1 $\pm$ 20.9*     | 936.0 $\pm$ 16.8* | 55.6 $\pm$ 0.9      | 80.4 $\pm$ 2.2  | 430.2 $\pm$ 5.6         | 274.8 $\pm$ 3.3  |
| Oct. 19 | 82.7 $\pm$ 2.8   | 69.6 $\pm$ 2.5  | 3.9 $\pm$ 0.1   | NQ             | 756.2 $\pm$ 25.7  | 667.3 $\pm$ 17.4* | 1291.1 $\pm$ 54.2*     | 837.0 $\pm$ 19.3  | 56.9 $\pm$ 1.8      | 80.4 $\pm$ 2.1  | 443.6 $\pm$ 14.6        | 249.1 $\pm$ 3.0  |
| Nov. 1  | 82.7 $\pm$ 1.2   | 71.0 $\pm$ 2.3  | 3.5 $\pm$ 0.1   | 3.6 $\pm$ 0.1  | 764.3 $\pm$ 11.5  | 634.7 $\pm$ 8.3   | 1309.6 $\pm$ 41.9*     | 808.3 $\pm$ 15.4  | 57.7 $\pm$ 0.9      | 93.1 $\pm$ 3.1* | 413.2 $\pm$ 12.0        | 302.3 $\pm$ 7.3  |
| Nov. 16 | 83.0 $\pm$ 2.4   | 72.2 $\pm$ 2.4  | 3.5 $\pm$ 0.1   | NQ             | 768.7 $\pm$ 24.6  | 625.2 $\pm$ 14.4  | 1280.2 $\pm$ 37.1*     | 753.4 $\pm$ 24.9  | 56.6 $\pm$ 1.1      | 79.1 $\pm$ 2.6  | 387.2 $\pm$ 8.9         | 376.3 $\pm$ 6.4* |
| Nov. 29 | 76.9 $\pm$ 3.2   | 69.1 $\pm$ 3.0  | NQ              | NQ             | 754.3 $\pm$ 31.7  | 673.0 $\pm$ 15.5* | 1118.7 $\pm$ 19.0      | 982.0 $\pm$ 14.7* | 59.8 $\pm$ 2.5      | 81.6 $\pm$ 3.5  | 378.1 $\pm$ 6.8         | 398.8 $\pm$ 9.2* |
| Dec. 13 | 76.3 $\pm$ 2.4   | 66.1 $\pm$ 1.3  | NQ              | NQ             | 767.4 $\pm$ 26.1  | 650.1 $\pm$ 12.4* | 1217.5 $\pm$ 51.1      | 963.6 $\pm$ 18.3* | 65.7 $\pm$ 2.8      | 80.5 $\pm$ 2.3  | 363.5 $\pm$ 8.0         | 283.2 $\pm$ 5.4  |
| Dec. 28 | 72.2 $\pm$ 2.1   | 64.6 $\pm$ 2.1  | NQ              | NQ             | 518.2 $\pm$ 15.0  | 551.4 $\pm$ 12.7  | 1172.4 $\pm$ 57.4      | 889.5 $\pm$ 21.3  | 62.3 $\pm$ 1.8      | 79.5 $\pm$ 2.6  | 362.4 $\pm$ 10.5        | 264.5 $\pm$ 6.1  |

Results are presented as means  $\pm$  SD of the samples collected at different dates in a certain forest plot. Values marked with \* in the same column indicate the highest ( $p < 0.05$ ) amounts in samples. ND—not detected, NQ—not quantified (amount below the limits of quantification (LOQ)).

**Table S4.** Contents of kaempferol and quercetin glycosides ( $\mu\text{g/g DW} \pm \text{SD}$ ) in young and old lingonberry leaves, collected throughout one year.

| Date    | Nicotiflorin     |                 | Astragalin       |                  | Afzelin         |                 | Quercitrin         |                    | Quercetin-HMG-rhamnoside |                    | 6"-O-acetylisoquercitrin |                 |
|---------|------------------|-----------------|------------------|------------------|-----------------|-----------------|--------------------|--------------------|--------------------------|--------------------|--------------------------|-----------------|
|         | Young leaves     | Old leaves      | Young leaves     | Old leaves       | Young leaves    | Old leaves      | Young leaves       | Old leaves         | Young leaves             | Old leaves         | Young leaves             | Old leaves      |
| Jan. 11 | 74.0 $\pm$ 1.2   | 54.8 $\pm$ 1.4  | 65.3 $\pm$ 1.0   | 51.1 $\pm$ 1.3   | 73.4 $\pm$ 1.2  | 73.8 $\pm$ 3.1  | 1110.9 $\pm$ 52.2  | 1338.6 $\pm$ 37.5  | 1407.4 $\pm$ 38.0        | 1278.0 $\pm$ 23.0  | 75.4 $\pm$ 1.2           | 60.9 $\pm$ 0.9  |
| Jan. 24 | 66.4 $\pm$ 2.2   | 55.1 $\pm$ 1.6  | 63.9 $\pm$ 2.1   | 55.3 $\pm$ 1.6   | 73.1 $\pm$ 3.3  | 68.4 $\pm$ 2.5  | 1161.2 $\pm$ 48.8  | 906.6 $\pm$ 32.6   | 1061.0 $\pm$ 12.7        | 1178.5 $\pm$ 30.6  | 77.2 $\pm$ 2.5           | 60.0 $\pm$ 1.7  |
| Feb. 7  | 68.5 $\pm$ 2.3   | 65.5 $\pm$ 1.9  | 69.0 $\pm$ 3.0   | 60.3 $\pm$ 1.7   | 73.2 $\pm$ 3.1  | 68.5 $\pm$ 2.0  | 1043.2 $\pm$ 33.4  | 1494.8 $\pm$ 23.3* | 1077.1 $\pm$ 23.7        | 1252.5 $\pm$ 36.3  | 77.3 $\pm$ 3.3           | 56.7 $\pm$ 1.6  |
| Feb. 21 | 85.9 $\pm$ 3.3   | 61.6 $\pm$ 1.4  | 67.8 $\pm$ 2.6   | 62.6 $\pm$ 1.4   | 77.9 $\pm$ 3.0  | 66.9 $\pm$ 1.5  | 1117.3 $\pm$ 32.4  | 1146.0 $\pm$ 37.8  | 1126.1 $\pm$ 21.4        | 1284.8 $\pm$ 42.4  | 77.6 $\pm$ 3.0           | 57.4 $\pm$ 1.3  |
| Mar. 7  | 83.2 $\pm$ 1.4   | 64.3 $\pm$ 1.2  | 72.4 $\pm$ 1.2   | 65.4 $\pm$ 1.2   | 88.8 $\pm$ 3.3  | 63.4 $\pm$ 1.1  | 1081.4 $\pm$ 40.0  | 969.5 $\pm$ 17.5   | 1179.7 $\pm$ 20.1        | 1200.3 $\pm$ 33.6  | 73.9 $\pm$ 1.3           | 42.0 $\pm$ 0.8  |
| Mar. 21 | 102.3 $\pm$ 3.1  | 65.1 $\pm$ 1.6  | 94.2 $\pm$ 2.8   | 66.7 $\pm$ 1.7   | 94.8 $\pm$ 3.2* | 60.6 $\pm$ 0.9  | 1216.5 $\pm$ 36.5  | 982.7 $\pm$ 24.6   | 1042.9 $\pm$ 21.9        | 1169.1 $\pm$ 40.9  | 82.0 $\pm$ 1.5*          | 39.9 $\pm$ 1.0  |
| Apr. 4  | 103.4 $\pm$ 3.1  | 65.0 $\pm$ 1.6  | 101.9 $\pm$ 3.1  | 66.0 $\pm$ 1.6   | 84.5 $\pm$ 3.5  | 56.1 $\pm$ 1.4  | 972.6 $\pm$ 21.4   | 946.4 $\pm$ 24.6   | 1097.9 $\pm$ 14.3        | 1112.7 $\pm$ 21.1  | 65.6 $\pm$ 2.0           | 39.5 $\pm$ 1.0  |
| Apr. 17 | 105.1 $\pm$ 4.4  | 74.5 $\pm$ 2.0  | 87.7 $\pm$ 3.7   | 71.7 $\pm$ 1.2   | 79.1 $\pm$ 2.4  | 55.5 $\pm$ 0.9  | 966.9 $\pm$ 29.0   | 1408.6 $\pm$ 23.9  | 1126.6 $\pm$ 37.2        | 1059.6 $\pm$ 23.3  | 66.6 $\pm$ 2.8           | 44.5 $\pm$ 0.8  |
| May 1   | 88.2 $\pm$ 3.1   | 67.4 $\pm$ 2.0  | 88.5 $\pm$ 2.3   | 67.9 $\pm$ 1.7   | 32.5 $\pm$ 0.5  | 44.4 $\pm$ 1.8  | 354.0 $\pm$ 8.8    | 1025.9 $\pm$ 30.8  | 1081.2 $\pm$ 24.9        | 1193.7 $\pm$ 26.3  | 24.0 $\pm$ 0.6           | 46.4 $\pm$ 1.2  |
| May 15  | 94.8 $\pm$ 2.8   | 74.9 $\pm$ 2.2  | 89.7 $\pm$ 1.6   | 76.5 $\pm$ 1.1   | 24.9 $\pm$ 0.4  | 46.2 $\pm$ 1.2  | 348.2 $\pm$ 6.6    | 1115.0 $\pm$ 16.7  | 1064.3 $\pm$ 23.4        | 1114.5 $\pm$ 43.5  | 25.8 $\pm$ 0.5           | 49.2 $\pm$ 0.7  |
| May 29  | 99.9 $\pm$ 3.5   | 74.1 $\pm$ 1.7  | 95.8 $\pm$ 3.7   | 69.7 $\pm$ 2.1   | 25.7 $\pm$ 0.7  | 45.0 $\pm$ 1.6  | 404.8 $\pm$ 14.2   | 819.0 $\pm$ 22.9   | 1372.3 $\pm$ 41.2        | 948.0 $\pm$ 21.8   | 26.2 $\pm$ 1.0           | 45.5 $\pm$ 1.4  |
| Jun. 13 | 240.8 $\pm$ 9.9* | 82.0 $\pm$ 2.2  | 212.3 $\pm$ 9.6* | 70.0 $\pm$ 1.6   | 24.7 $\pm$ 1.0  | 52.4 $\pm$ 1.1  | 473.1 $\pm$ 7.1    | 1235.4 $\pm$ 35.8  | 2415.9 $\pm$ 74.9        | 983.9 $\pm$ 24.6   | 28.4 $\pm$ 1.0           | 48.7 $\pm$ 1.6  |
| Jun. 28 | 235.7 $\pm$ 8.0* | 77.9 $\pm$ 1.3  | 161.1 $\pm$ 7.2  | 66.1 $\pm$ 1.1   | 24.3 $\pm$ 0.4  | 59.1 $\pm$ 2.0  | 513.9 $\pm$ 5.7    | 1226.6 $\pm$ 30.7  | 2644.7 $\pm$ 111.1*      | 1382.6 $\pm$ 37.3  | 25.6 $\pm$ 0.4           | 56.7 $\pm$ 2.0  |
| Jul. 15 | 184.2 $\pm$ 3.3  | 81.1 $\pm$ 1.2  | 112.7 $\pm$ 3.3  | 65.4 $\pm$ 2.0   | 18.3 $\pm$ 0.3  | 59.7 $\pm$ 2.5  | 548.3 $\pm$ 12.6   | 1124.8 $\pm$ 34.9  | 2464.5 $\pm$ 93.7        | 1435.3 $\pm$ 21.5  | 30.0 $\pm$ 0.9           | 55.7 $\pm$ 2.3  |
| Jul. 29 | 127.2 $\pm$ 5.0  | 78.0 $\pm$ 2.3  | 107.6 $\pm$ 3.8  | 71.6 $\pm$ 1.6   | 21.5 $\pm$ 0.5  | 57.0 $\pm$ 1.7  | 511.5 $\pm$ 18.9   | 1155.1 $\pm$ 39.3  | 2101.6 $\pm$ 54.6        | 1405.8 $\pm$ 23.9  | 29.2 $\pm$ 1.0           | 54.2 $\pm$ 1.2  |
| Aug. 11 | 139.2 $\pm$ 3.5  | 84.4 $\pm$ 1.9  | 118.6 $\pm$ 4.9  | 63.0 $\pm$ 1.7   | 38.3 $\pm$ 0.7  | 59.0 $\pm$ 0.9  | 649.1 $\pm$ 11.0   | 1021.7 $\pm$ 23.5  | 2067.9 $\pm$ 64.1        | 1406.7 $\pm$ 36.6  | 43.9 $\pm$ 1.8           | 52.9 $\pm$ 1.4  |
| Aug. 24 | 150.3 $\pm$ 6.8  | 83.2 $\pm$ 1.3  | 121.3 $\pm$ 4.1  | 65.0 $\pm$ 1.1   | 59.9 $\pm$ 1.3  | 66.3 $\pm$ 2.4  | 695.1 $\pm$ 10.4   | 927.0 $\pm$ 33.4   | 1741.5 $\pm$ 78.4        | 1477.1 $\pm$ 38.4  | 52.4 $\pm$ 1.8           | 59.1 $\pm$ 2.2  |
| Sep. 6  | 125.1 $\pm$ 4.4  | 95.7 $\pm$ 2.0* | 95.9 $\pm$ 3.4   | 88.1 $\pm$ 1.9   | 56.4 $\pm$ 2.1  | 62.7 $\pm$ 2.6  | 711.0 $\pm$ 24.9   | 1187.7 $\pm$ 35.6  | 1437.9 $\pm$ 50.3        | 1578.5 $\pm$ 33.1  | 51.6 $\pm$ 1.8           | 59.2 $\pm$ 1.2  |
| Sep. 20 | 116.4 $\pm$ 3.4  | 95.3 $\pm$ 3.1* | 101.5 $\pm$ 2.9  | 104.9 $\pm$ 3.4* | 66.2 $\pm$ 1.9  | 62.6 $\pm$ 2.6  | 708.6 $\pm$ 20.5   | 966.6 $\pm$ 29.0   | 1436.9 $\pm$ 25.9        | 1586.6 $\pm$ 66.6  | 53.6 $\pm$ 1.6           | 60.4 $\pm$ 1.9  |
| Oct. 4  | 94.9 $\pm$ 1.5   | 60.8 $\pm$ 1.1  | 90.0 $\pm$ 1.4   | 105.7 $\pm$ 1.9* | 60.8 $\pm$ 0.8  | 65.1 $\pm$ 2.7  | 690.0 $\pm$ 11.0   | 1231.9 $\pm$ 33.3  | 1410.1 $\pm$ 36.7        | 1409.1 $\pm$ 38.0  | 54.4 $\pm$ 0.9           | 58.4 $\pm$ 1.1  |
| Oct. 19 | 88.5 $\pm$ 3.7   | 50.9 $\pm$ 2.2  | 86.2 $\pm$ 3.6   | 95.4 $\pm$ 4.1   | 69.7 $\pm$ 2.3  | 67.7 $\pm$ 0.8  | 962.3 $\pm$ 32.7   | 984.2 $\pm$ 35.4   | 1483.1 $\pm$ 50.4        | 1414.8 $\pm$ 36.8  | 67.7 $\pm$ 2.8           | 63.1 $\pm$ 2.7  |
| Nov. 1  | 97.9 $\pm$ 3.1   | 48.0 $\pm$ 0.9  | 100.3 $\pm$ 3.2  | 91.8 $\pm$ 1.7   | 76.8 $\pm$ 2.2  | 67.8 $\pm$ 2.0  | 1037.7 $\pm$ 15.6  | 1106.3 $\pm$ 36.5  | 1635.4 $\pm$ 24.5        | 1383.1 $\pm$ 18.0  | 69.9 $\pm$ 2.2           | 65.6 $\pm$ 1.2  |
| Nov. 16 | 93.0 $\pm$ 2.7   | 51.7 $\pm$ 1.7  | 97.9 $\pm$ 2.8   | 67.7 $\pm$ 2.2   | 77.6 $\pm$ 1.8  | 68.4 $\pm$ 1.2  | 1072.9 $\pm$ 31.1  | 968.8 $\pm$ 32.0   | 1890.9 $\pm$ 60.5        | 1519.1 $\pm$ 34.9  | 68.5 $\pm$ 2.0           | 63.0 $\pm$ 2.1  |
| Nov. 29 | 91.2 $\pm$ 1.6   | 50.7 $\pm$ 1.8  | 83.8 $\pm$ 1.4   | 70.8 $\pm$ 2.5   | 73.5 $\pm$ 1.3  | 84.1 $\pm$ 1.9* | 1057.2 $\pm$ 44.4  | 1305.9 $\pm$ 56.2  | 1634.2 $\pm$ 68.6        | 1735.1 $\pm$ 39.9* | 69.8 $\pm$ 1.2           | 71.2 $\pm$ 2.5* |
| Dec. 13 | 79.8 $\pm$ 3.4   | 45.0 $\pm$ 0.9  | 78.1 $\pm$ 3.3   | 50.4 $\pm$ 1.0   | 77.2 $\pm$ 1.7  | 73.8 $\pm$ 2.9  | 1367.1 $\pm$ 43.7* | 1114.2 $\pm$ 21.2  | 1538.1 $\pm$ 52.3        | 1390.3 $\pm$ 26.4  | 74.0 $\pm$ 3.1           | 62.0 $\pm$ 1.2  |
| Dec. 28 | 62.8 $\pm$ 3.1   | 50.5 $\pm$ 1.2  | 64.0 $\pm$ 3.1   | 51.3 $\pm$ 1.2   | 73.7 $\pm$ 2.1  | 76.7 $\pm$ 1.8  | 1310.6 $\pm$ 57.7* | 1220.8 $\pm$ 15.9  | 1465.6 $\pm$ 42.5        | 1380.7 $\pm$ 45.6  | 74.9 $\pm$ 3.7           | 62.0 $\pm$ 1.5  |

Results are presented as means  $\pm$  SD of the samples collected at different dates in a certain forest plot. Values marked with \* in the same column indicate the highest ( $p < 0.05$ ) amounts in samples.

**Table S5.** Contents of quercetin glycosides ( $\mu\text{g/g DW} \pm \text{SD}$ ) in young and old lingonberry leaves, collected throughout one year.

| Date    | Rutin               |                    | Hyperoside          |                    | Isoquercitrin      |                  | Reynoutrin        |                   | Guaiaverin         |                    | Avicularin         |                    |
|---------|---------------------|--------------------|---------------------|--------------------|--------------------|------------------|-------------------|-------------------|--------------------|--------------------|--------------------|--------------------|
|         | Young leaves        | Old leaves         | Young leaves        | Old leaves         | Young leaves       | Old leaves       | Young leaves      | Old leaves        | Young leaves       | Old leaves         | Young leaves       | Old leaves         |
| Jan. 11 | 727.4 $\pm$ 12.4    | 444.0 $\pm$ 12.4   | 2573.7 $\pm$ 43.8   | 1906.1 $\pm$ 34.3  | 751.3 $\pm$ 39.1   | 640.6 $\pm$ 6.4  | 592.5 $\pm$ 10.1  | 507.5 $\pm$ 9.1   | 1062.4 $\pm$ 18.1  | 911.4 $\pm$ 16.4   | 3379.9 $\pm$ 98.0  | 2286.0 $\pm$ 75.4  |
| Jan. 24 | 806.0 $\pm$ 33.9    | 676.5 $\pm$ 24.4   | 2625.6 $\pm$ 110.3  | 2019.2 $\pm$ 72.7  | 801.2 $\pm$ 17.6   | 680.7 $\pm$ 19.7 | 567.4 $\pm$ 23.8  | 546.7 $\pm$ 19.7  | 1146.9 $\pm$ 48.2  | 925.2 $\pm$ 24.1   | 3126.0 $\pm$ 146.9 | 2159.2 $\pm$ 54.0  |
| Feb. 7  | 853.9 $\pm$ 27.3    | 692.2 $\pm$ 27.0   | 2734.7 $\pm$ 114.9  | 1926.9 $\pm$ 55.9  | 712.3 $\pm$ 21.4   | 888.4 $\pm$ 9.8* | 626.5 $\pm$ 26.3  | 581.8 $\pm$ 16.9  | 1177.7 $\pm$ 49.5  | 849.1 $\pm$ 24.6   | 3500.9 $\pm$ 115.5 | 2182.6 $\pm$ 63.3  |
| Feb. 21 | 907.1 $\pm$ 26.3    | 715.1 $\pm$ 23.6   | 2876.8 $\pm$ 83.4   | 1780.9 $\pm$ 58.8  | 727.5 $\pm$ 32.7   | 645.2 $\pm$ 15.5 | 680.0 $\pm$ 19.7  | 528.7 $\pm$ 17.4  | 1431.2 $\pm$ 41.5  | 872.5 $\pm$ 20.1   | 3783.5 $\pm$ 87.6* | 2153.4 $\pm$ 49.5  |
| Mar. 7  | 947.1 $\pm$ 35.0    | 670.1 $\pm$ 12.1   | 3240.0 $\pm$ 119.9* | 1703.0 $\pm$ 47.7  | 747.2 $\pm$ 26.2   | 631.2 $\pm$ 7.6  | 671.3 $\pm$ 24.8  | 441.1 $\pm$ 7.9   | 1568.9 $\pm$ 73.7  | 783.1 $\pm$ 21.9   | 2881.9 $\pm$ 49.0  | 1842.8 $\pm$ 33.2  |
| Mar. 21 | 1220.3 $\pm$ 36.6   | 696.8 $\pm$ 17.4   | 3754.9 $\pm$ 127.7* | 1794.8 $\pm$ 44.9  | 819.0 $\pm$ 37.7   | 642.3 $\pm$ 28.9 | 841.3 $\pm$ 28.6* | 412.7 $\pm$ 6.2   | 1770.2 $\pm$ 77.9* | 829.0 $\pm$ 12.4   | 2914.4 $\pm$ 122.4 | 1945.1 $\pm$ 48.6  |
| Apr. 4  | 1202.9 $\pm$ 36.1   | 667.1 $\pm$ 16.7   | 2722.9 $\pm$ 81.7   | 1529.9 $\pm$ 38.2  | 739.6 $\pm$ 23.7   | 622.5 $\pm$ 17.4 | 628.1 $\pm$ 26.4  | 398.8 $\pm$ 10.0  | 1305.1 $\pm$ 39.2  | 710.2 $\pm$ 17.8   | 2911.7 $\pm$ 87.3  | 1698.2 $\pm$ 25.5  |
| Apr. 17 | 1095.2 $\pm$ 32.9   | 751.4 $\pm$ 12.8   | 2262.4 $\pm$ 67.9   | 1489.9 $\pm$ 25.3  | 813.4 $\pm$ 34.2   | 686.6 $\pm$ 24.7 | 551.2 $\pm$ 16.5  | 413.1 $\pm$ 7.0   | 1101.8 $\pm$ 45.2  | 817.5 $\pm$ 13.9   | 2558.0 $\pm$ 107.4 | 2039.2 $\pm$ 55.1  |
| May 1   | 1054.4 $\pm$ 26.4   | 681.4 $\pm$ 20.4   | 867.5 $\pm$ 21.7    | 1514.3 $\pm$ 45.4  | 303.2 $\pm$ 3.6    | 516.0 $\pm$ 20.1 | 223.2 $\pm$ 3.3   | 408.0 $\pm$ 16.7  | 432.8 $\pm$ 6.5    | 775.7 $\pm$ 32.6   | 992.3 $\pm$ 15.9   | 2050.7 $\pm$ 71.8  |
| May 15  | 1186.1 $\pm$ 22.5   | 670.6 $\pm$ 7.4    | 823.1 $\pm$ 15.6    | 1967.2 $\pm$ 21.6  | 763.5 $\pm$ 14.5   | 596.4 $\pm$ 19.7 | 267.9 $\pm$ 5.1   | 438.7 $\pm$ 9.2   | 441.8 $\pm$ 8.4    | 897.7 $\pm$ 27.8   | 1065.5 $\pm$ 19.2  | 2072.0 $\pm$ 31.1  |
| May 29  | 1314.1 $\pm$ 32.9   | 613.0 $\pm$ 14.1   | 974.3 $\pm$ 24.4    | 1986.9 $\pm$ 49.7  | 819.6 $\pm$ 27.0   | 546.4 $\pm$ 9.3  | 245.0 $\pm$ 6.1   | 437.7 $\pm$ 15.3  | 488.7 $\pm$ 12.2   | 822.6 $\pm$ 20.6   | 1130.6 $\pm$ 44.1  | 2042.3 $\pm$ 61.3  |
| Jun. 13 | 2312.4 $\pm$ 71.7*  | 726.5 $\pm$ 34.1   | 1052.3 $\pm$ 31.6   | 1870.1 $\pm$ 35.5  | 1436.5 $\pm$ 44.5* | 547.3 $\pm$ 8.8  | 221.6 $\pm$ 6.6   | 480.8 $\pm$ 9.1   | 455.5 $\pm$ 13.7   | 856.1 $\pm$ 24.8   | 1098.5 $\pm$ 27.5  | 2073.1 $\pm$ 47.7  |
| Jun. 28 | 2218.8 $\pm$ 119.8* | 723.6 $\pm$ 26.8   | 1051.2 $\pm$ 11.6   | 1963.2 $\pm$ 49.1  | 1204.3 $\pm$ 20.5  | 550.6 $\pm$ 8.3  | 224.7 $\pm$ 2.5   | 485.9 $\pm$ 17.0  | 413.8 $\pm$ 4.6    | 918.0 $\pm$ 32.1   | 1161.5 $\pm$ 52.3  | 2120.2 $\pm$ 33.9  |
| Jul. 15 | 1518.2 $\pm$ 42.5   | 726.0 $\pm$ 25.4   | 1039.7 $\pm$ 15.6   | 1880.3 $\pm$ 67.7  | 1068.3 $\pm$ 36.3  | 682.1 $\pm$ 13.0 | 272.4 $\pm$ 7.9   | 485.8 $\pm$ 7.3   | 435.5 $\pm$ 6.5    | 876.7 $\pm$ 31.6   | 1101.0 $\pm$ 31.9  | 2017.1 $\pm$ 86.7  |
| Jul. 29 | 1524.4 $\pm$ 59.5   | 704.1 $\pm$ 14.8   | 1141.8 $\pm$ 43.4   | 2017.1 $\pm$ 44.4  | 1108.2 $\pm$ 38.8  | 657.8 $\pm$ 8.6  | 256.2 $\pm$ 10.0  | 463.6 $\pm$ 9.7   | 500.2 $\pm$ 19.0   | 932.1 $\pm$ 20.5   | 1035.7 $\pm$ 36.2  | 2114.2 $\pm$ 48.6  |
| Aug. 11 | 1597.9 $\pm$ 39.9   | 674.3 $\pm$ 15.5   | 2123.8 $\pm$ 74.3   | 1926.8 $\pm$ 28.9  | 1110.5 $\pm$ 18.9  | 627.7 $\pm$ 11.3 | 409.9 $\pm$ 6.1   | 371.7 $\pm$ 8.5   | 927.4 $\pm$ 29.7   | 904.6 $\pm$ 13.6   | 2045.2 $\pm$ 83.9  | 2201.1 $\pm$ 59.4  |
| Aug. 24 | 1598.4 $\pm$ 24.0   | 768.7 $\pm$ 27.7   | 2057.5 $\pm$ 57.6   | 1992.8 $\pm$ 29.9  | 1075.9 $\pm$ 26.9  | 730.8 $\pm$ 8.0  | 445.9 $\pm$ 6.7   | 476.4 $\pm$ 17.1  | 993.2 $\pm$ 27.8   | 879.6 $\pm$ 13.2   | 2161.3 $\pm$ 73.5  | 2040.9 $\pm$ 34.7  |
| Sep. 6  | 1573.9 $\pm$ 59.8   | 1026.4 $\pm$ 22.6* | 2347.5 $\pm$ 91.6   | 2347.3 $\pm$ 49.3  | 1078.8 $\pm$ 20.5  | 734.6 $\pm$ 18.4 | 458.4 $\pm$ 17.4  | 516.2 $\pm$ 11.4  | 1027.5 $\pm$ 29.8  | 1054.5 $\pm$ 43.2  | 2233.3 $\pm$ 78.2  | 2085.9 $\pm$ 43.8  |
| Sep. 20 | 1463.6 $\pm$ 42.4   | 959.7 $\pm$ 40.3*  | 2717.2 $\pm$ 78.8   | 2314.7 $\pm$ 97.2  | 1190.4 $\pm$ 39.3  | 735.2 $\pm$ 12.5 | 578.6 $\pm$ 16.8  | 554.2 $\pm$ 23.3  | 1048.2 $\pm$ 40.9  | 966.9 $\pm$ 40.6   | 2769.4 $\pm$ 108.0 | 2109.8 $\pm$ 67.5  |
| Oct. 4  | 1224.4 $\pm$ 19.6   | 842.5 $\pm$ 31.2   | 2540.2 $\pm$ 61.0   | 2257.3 $\pm$ 38.4  | 1046.4 $\pm$ 18.8  | 723.7 $\pm$ 10.9 | 561.0 $\pm$ 13.5  | 532.8 $\pm$ 22.4  | 1210.7 $\pm$ 29.1  | 974.4 $\pm$ 16.6   | 2660.6 $\pm$ 42.6  | 2315.3 $\pm$ 41.7  |
| Oct. 19 | 1160.4 $\pm$ 39.5   | 823.6 $\pm$ 29.6   | 2800.4 $\pm$ 123.2  | 2190.0 $\pm$ 78.8  | 1018.6 $\pm$ 21.4  | 680.3 $\pm$ 12.9 | 633.6 $\pm$ 14.6  | 538.5 $\pm$ 11.8  | 1281.7 $\pm$ 56.4  | 985.0 $\pm$ 35.5   | 3022.3 $\pm$ 126.9 | 2413.5 $\pm$ 55.5  |
| Nov. 1  | 1283.1 $\pm$ 19.2   | 772.8 $\pm$ 25.5   | 2826.0 $\pm$ 98.9   | 2277.4 $\pm$ 29.6  | 1066.0 $\pm$ 32.0  | 698.6 $\pm$ 10.5 | 703.6 $\pm$ 27.4  | 503.0 $\pm$ 14.6  | 1293.2 $\pm$ 45.3  | 1032.9 $\pm$ 13.4  | 3273.3 $\pm$ 104.7 | 2498.0 $\pm$ 47.5  |
| Nov. 16 | 1202.0 $\pm$ 34.9   | 772.3 $\pm$ 25.5   | 2843.8 $\pm$ 139.3  | 2453.2 $\pm$ 81.0* | 1123.4 $\pm$ 25.8  | 651.3 $\pm$ 9.8  | 679.9 $\pm$ 22.4  | 539.5 $\pm$ 9.2   | 1396.2 $\pm$ 68.4  | 1068.5 $\pm$ 35.3  | 3165.7 $\pm$ 91.8  | 2683.0 $\pm$ 88.5* |
| Nov. 29 | 1039.5 $\pm$ 43.7   | 734.3 $\pm$ 31.6   | 2790.7 $\pm$ 117.2  | 2583.8 $\pm$ 59.4* | 1046.1 $\pm$ 46.0  | 721.7 $\pm$ 7.9  | 647.9 $\pm$ 27.2  | 651.3 $\pm$ 15.0* | 1221.9 $\pm$ 51.3  | 1226.4 $\pm$ 15.9* | 3172.5 $\pm$ 149.1 | 2793.7 $\pm$ 69.9* |
| Dec. 13 | 1006.5 $\pm$ 32.2   | 521.4 $\pm$ 20.3   | 2778.9 $\pm$ 88.9   | 1435.5 $\pm$ 56.0  | 973.5 $\pm$ 24.3   | 683.7 $\pm$ 11.6 | 640.5 $\pm$ 26.9  | 561.0 $\pm$ 16.3  | 1141.3 $\pm$ 36.5  | 1241.2 $\pm$ 48.4* | 3122.2 $\pm$ 131.1 | 2355.7 $\pm$ 54.2  |
| Dec. 28 | 692.2 $\pm$ 20.1    | 502.5 $\pm$ 6.5    | 2526.2 $\pm$ 73.3   | 1624.2 $\pm$ 21.1  | 821.4 $\pm$ 20.5   | 721.4 $\pm$ 10.1 | 561.3 $\pm$ 16.3  | 560.7 $\pm$ 7.3   | 1158.4 $\pm$ 33.6  | 902.1 $\pm$ 11.7   | 3530.1 $\pm$ 113.0 | 2520.1 $\pm$ 47.9  |

Results are presented as means  $\pm$  SD of the samples collected at different dates in a certain forest plot. Values marked with \* in the same column indicate the highest ( $p < 0.05$ ) amounts in samples.

**Table S6.** Contents of triterpenoid acids and sterols ( $\mu\text{g/g DW} \pm \text{SD}$ ) in young and old lingonberry leaves, collected throughout one year.

| Date           | Maslinic acid    |                  | Corosolic acid  |                  | Betulinic acid  |                 | Oleanolic acid   |                  | Ursolic acid      |                   | $\beta$ -Sitosterol |                   |
|----------------|------------------|------------------|-----------------|------------------|-----------------|-----------------|------------------|------------------|-------------------|-------------------|---------------------|-------------------|
|                | Young leaves     | Old leaves       | Young leaves    | Old leaves       | Young leaves    | Old leaves      | Young leaves     | Old leaves       | Young leaves      | Old leaves        | Young leaves        | Old leaves        |
| <b>Jan. 11</b> | 138.8 $\pm$ 2.4  | 136.9 $\pm$ 5.2  | 68.9 $\pm$ 1.2  | 111.0 $\pm$ 4.2  | 15.7 $\pm$ 0.5  | 31.8 $\pm$ 1.1  | 107.9 $\pm$ 1.8  | 121.3 $\pm$ 2.2  | 504.3 $\pm$ 18.7  | 356.7 $\pm$ 6.4   | 221.4 $\pm$ 3.8     | 105.7 $\pm$ 1.9   |
| <b>Jan. 24</b> | 128.6 $\pm$ 5.4  | 136.8 $\pm$ 4.9  | 81.2 $\pm$ 1.8* | 152.7 $\pm$ 5.5* | 16.4 $\pm$ 0.2  | 22.3 $\pm$ 0.8  | 96.2 $\pm$ 4.0   | 109.2 $\pm$ 4.3  | 486.7 $\pm$ 20.4  | 435.9 $\pm$ 15.7  | 200.1 $\pm$ 8.4     | 118.4 $\pm$ 3.1   |
| <b>Feb. 7</b>  | 128.6 $\pm$ 4.1  | 129.8 $\pm$ 5.1  | 75.4 $\pm$ 2.4  | 92.4 $\pm$ 3.6   | 7.6 $\pm$ 0.3   | 12.9 $\pm$ 0.1  | 94.8 $\pm$ 3.0   | 75.5 $\pm$ 2.2   | 380.8 $\pm$ 12.2  | 454.4 $\pm$ 13.2  | 140.1 $\pm$ 5.9     | 146.6 $\pm$ 4.3   |
| <b>Feb. 21</b> | 120.1 $\pm$ 3.5  | 132.8 $\pm$ 4.4  | 59.1 $\pm$ 1.7  | 95.8 $\pm$ 3.2   | 5.6 $\pm$ 0.1   | 13.9 $\pm$ 0.5  | 69.1 $\pm$ 2.0   | 83.1 $\pm$ 2.7   | 366.1 $\pm$ 7.0   | 461.2 $\pm$ 15.2  | 137.1 $\pm$ 2.6     | 161.8 $\pm$ 3.7   |
| <b>Mar. 7</b>  | 122.5 $\pm$ 4.5  | 126.6 $\pm$ 6.1  | 51.5 $\pm$ 1.9  | 88.1 $\pm$ 1.6   | NQ              | NQ              | 55.5 $\pm$ 2.1   | 96.9 $\pm$ 1.7   | 317.0 $\pm$ 5.4   | 453.4 $\pm$ 12.7  | 109.4 $\pm$ 3.0     | 163.9 $\pm$ 4.6   |
| <b>Mar. 21</b> | 119.5 $\pm$ 3.6  | 121.7 $\pm$ 3.0  | 52.5 $\pm$ 1.7  | 41.0 $\pm$ 0.6   | NQ              | NQ              | 49.8 $\pm$ 1.5   | 93.9 $\pm$ 2.3   | 303.7 $\pm$ 9.1   | 468.1 $\pm$ 11.7  | 102.5 $\pm$ 4.5     | 153.8 $\pm$ 2.3   |
| <b>Apr. 4</b>  | 126.6 $\pm$ 1.6  | 135.5 $\pm$ 3.9  | 48.4 $\pm$ 1.5  | 44.5 $\pm$ 1.1   | NQ              | NQ              | 49.5 $\pm$ 1.5   | 105.4 $\pm$ 2.6  | 306.3 $\pm$ 10.1  | 503.4 $\pm$ 19.6  | 101.0 $\pm$ 2.6     | 141.0 $\pm$ 3.5   |
| <b>Apr. 17</b> | 111.7 $\pm$ 3.7  | 141.6 $\pm$ 5.9  | 34.5 $\pm$ 1.0  | 47.4 $\pm$ 0.8   | NQ              | NQ              | 45.5 $\pm$ 1.4   | 117.4 $\pm$ 2.0  | 294.7 $\pm$ 9.7   | 543.3 $\pm$ 22.8  | 109.3 $\pm$ 4.5     | 141.6 $\pm$ 2.4   |
| <b>May 1</b>   | 73.3 $\pm$ 3.2   | 98.5 $\pm$ 2.2   | 28 $\pm$ 0.7    | 46.4 $\pm$ 1.4   | NQ              | NQ              | 42.8 $\pm$ 1.1   | 119.8 $\pm$ 3.6  | 270.9 $\pm$ 11.7  | 624.9 $\pm$ 13.7  | 76.7 $\pm$ 1.2      | 143.8 $\pm$ 4.6   |
| <b>May 15</b>  | 61.9 $\pm$ 1.4   | 80.6 $\pm$ 2.3   | 29.2 $\pm$ 0.6  | 58.1 $\pm$ 1.7   | NQ              | NQ              | 49.6 $\pm$ 0.9   | 103.5 $\pm$ 3.1  | 297.4 $\pm$ 6.5   | 569.2 $\pm$ 22.2  | 62.7 $\pm$ 1.2      | 153.5 $\pm$ 4.8   |
| <b>May 29</b>  | 16.2 $\pm$ 0.4   | 23.6 $\pm$ 0.5   | 8.5 $\pm$ 0.2   | 44.2 $\pm$ 1.0   | NQ              | NQ              | 49.4 $\pm$ 1.2   | 106.4 $\pm$ 2.4  | 181.0 $\pm$ 5.4   | 588.2 $\pm$ 13.5  | 52.6 $\pm$ 1.3      | 162.0 $\pm$ 5.7   |
| <b>Jun. 13</b> | 3.2 $\pm$ 0.1    | 36.6 $\pm$ 1.6   | 9.7 $\pm$ 0.3   | 59.9 $\pm$ 2.9   | NQ              | NQ              | 62.3 $\pm$ 0.7   | 99.8 $\pm$ 4.7   | 286.2 $\pm$ 8.9   | 624.5 $\pm$ 28.1  | 196.1 $\pm$ 4.1     | 207.8 $\pm$ 8.1   |
| <b>Jun. 28</b> | 4.8 $\pm$ 0.2    | 45.8 $\pm$ 1.2   | 8.8 $\pm$ 0.2   | 62.7 $\pm$ 2.9   | NQ              | NQ              | 64.8 $\pm$ 2.2   | 111.9 $\pm$ 5.3  | 363.4 $\pm$ 8.7   | 647.2 $\pm$ 17.5  | 221.0 $\pm$ 6.9     | 200.3 $\pm$ 7.0   |
| <b>Jul. 15</b> | 6.3 $\pm$ 0.2    | 45.6 $\pm$ 1.6   | 10.6 $\pm$ 0.2  | 85.9 $\pm$ 2.1   | NQ              | NQ              | 70.6 $\pm$ 1.3   | 117.9 $\pm$ 2.9  | 369.5 $\pm$ 6.7   | 658.9 $\pm$ 29.7  | 228.4 $\pm$ 8       | 192.1 $\pm$ 3.1   |
| <b>Jul. 29</b> | 10.0 $\pm$ 0.2   | 52.2 $\pm$ 1.4   | 10.4 $\pm$ 0.3  | 86.5 $\pm$ 2.6   | NQ              | NQ              | 74.3 $\pm$ 2.2   | 120.6 $\pm$ 3.6  | 374.9 $\pm$ 6.0   | 638.0 $\pm$ 17.2  | 246.5 $\pm$ 9.4     | 218.0 $\pm$ 4.8   |
| <b>Aug. 11</b> | 17.7 $\pm$ 0.5   | 48.7 $\pm$ 1.8   | 22.4 $\pm$ 0.6  | 76.1 $\pm$ 1.8   | NQ              | 8.5 $\pm$ 0.4   | 80.3 $\pm$ 2.0   | 131.0 $\pm$ 3.7  | 447.6 $\pm$ 13.9  | 636.1 $\pm$ 22.9  | 244.8 $\pm$ 7.8     | 208.9 $\pm$ 3.1   |
| <b>Aug. 24</b> | 18.9 $\pm$ 0.3   | 36.8 $\pm$ 1.3   | 19.3 $\pm$ 0.3  | 79.4 $\pm$ 2.9   | NQ              | 9.8 $\pm$ 0.3   | 82.7 $\pm$ 1.2   | 132.9 $\pm$ 2.1  | 474.6 $\pm$ 7.1   | 685.7 $\pm$ 24.7  | 226.2 $\pm$ 6.3     | 206.3 $\pm$ 3.1   |
| <b>Sep. 6</b>  | 16.1 $\pm$ 0.4   | 36.2 $\pm$ 1.1   | 22.2 $\pm$ 0.8  | 95.2 $\pm$ 3.5   | NQ              | 10.7 $\pm$ 0.3  | 78.8 $\pm$ 1.2   | 142.6 $\pm$ 3.0  | 453.9 $\pm$ 15.9  | 690.7 $\pm$ 20.7  | 245.9 $\pm$ 7.1     | 255.1 $\pm$ 10.5  |
| <b>Sep. 20</b> | 17.7 $\pm$ 0.5   | 41.2 $\pm$ 1.7   | 21.5 $\pm$ 0.6  | 98.2 $\pm$ 4.1   | 13.1 $\pm$ 0.3  | 21.3 $\pm$ 0.8  | 93.0 $\pm$ 2.7   | 139.9 $\pm$ 5.9  | 500.9 $\pm$ 9.0   | 697.9 $\pm$ 29.3  | 259.3 $\pm$ 10.1    | 252.9 $\pm$ 10.6  |
| <b>Oct. 4</b>  | 15.9 $\pm$ 0.3   | 43.3 $\pm$ 1.6   | 27.8 $\pm$ 0.4  | 88.0 $\pm$ 3.3   | 14.1 $\pm$ 0.3  | 21.2 $\pm$ 0.5  | 99.3 $\pm$ 1.6   | 164.6 $\pm$ 6.1  | 505.7 $\pm$ 8.1   | 832.1 $\pm$ 30.8  | 267.8 $\pm$ 3.7     | 294.6 $\pm$ 5.0   |
| <b>Oct. 19</b> | 18.2 $\pm$ 0.6   | 76.3 $\pm$ 2.7   | 25.7 $\pm$ 0.9  | 84.8 $\pm$ 3.1   | 11.2 $\pm$ 0.3  | 30.1 $\pm$ 0.8  | 101.2 $\pm$ 3.4  | 191.7 $\pm$ 6.9* | 554.9 $\pm$ 18.9  | 902.7 $\pm$ 32.5* | 276.2 $\pm$ 12.2    | 390.7 $\pm$ 18.0* |
| <b>Nov. 1</b>  | 43.0 $\pm$ 0.6   | 67.6 $\pm$ 2.2   | 30.4 $\pm$ 0.5  | 81.0 $\pm$ 2.7   | 12.8 $\pm$ 0.3  | 28.0 $\pm$ 0.8  | 102.6 $\pm$ 1.5  | 185.0 $\pm$ 6.1* | 582.2 $\pm$ 8.7*  | 834.8 $\pm$ 27.5  | 294.3 $\pm$ 4.4     | 375.5 $\pm$ 12.4* |
| <b>Nov. 16</b> | 62.1 $\pm$ 1.8   | 81.6 $\pm$ 2.7   | 36.3 $\pm$ 1.1  | 100.2 $\pm$ 3.3  | 18.6 $\pm$ 0.2  | 29.2 $\pm$ 0.5  | 102.2 $\pm$ 3.0  | 170.5 $\pm$ 7.6  | 559.9 $\pm$ 16.2  | 754.2 $\pm$ 24.9  | 431.2 $\pm$ 21.1*   | 351.2 $\pm$ 8.1   |
| <b>Nov. 29</b> | 64.6 $\pm$ 2.7   | 154.3 $\pm$ 7.4  | 60.4 $\pm$ 1.9  | 100.3 $\pm$ 4.3  | 21.3 $\pm$ 0.5  | 29.8 $\pm$ 0.9  | 104.3 $\pm$ 4.0  | 178.1 $\pm$ 7.7  | 587.7 $\pm$ 24.7* | 722.6 $\pm$ 31.1  | 401.7 $\pm$ 16.9*   | 314.8 $\pm$ 4.1   |
| <b>Dec. 13</b> | 104.6 $\pm$ 3.3  | 174.3 $\pm$ 3.8* | 56.4 $\pm$ 1.8  | 90.6 $\pm$ 3.5   | 33.7 $\pm$ 1.0* | 54.8 $\pm$ 1.4* | 125.7 $\pm$ 2.8* | 169.3 $\pm$ 6.6  | 606.6 $\pm$ 19.4* | 729.6 $\pm$ 28.5  | 307.4 $\pm$ 12.9    | 243.6 $\pm$ 9.5   |
| <b>Dec. 28</b> | 155.0 $\pm$ 7.6* | 136.9 $\pm$ 4.5  | 69.3 $\pm$ 2.0  | 88.8 $\pm$ 3.8   | 29.8 $\pm$ 0.6* | 50.8 $\pm$ 1.5* | 124.6 $\pm$ 3.6* | 142.4 $\pm$ 6.1  | 499.9 $\pm$ 14.5  | 526.0 $\pm$ 17.4  | 277.0 $\pm$ 8.0     | 159.1 $\pm$ 2.1   |

Results are presented as means  $\pm$  SD of the samples collected at different dates in a certain forest plot. Values marked with \* in the same column indicate the highest ( $p < 0.05$ ) amounts in samples. NQ—not quantified (amount below LOQ).

**Table S7.** Contents of neutral triterpenoids ( $\mu\text{g/g DW} \pm \text{SD}$ ) in young and old lingonberry leaves, collected throughout one year.

| Date    | Betulin          |                  | Erythrodiol     |                  | Uvaol            |                  | Lupeol          |                  | $\alpha$ -Amyrin  |                    | $\beta$ -Amyrin |                  | Friedelin        |                  |
|---------|------------------|------------------|-----------------|------------------|------------------|------------------|-----------------|------------------|-------------------|--------------------|-----------------|------------------|------------------|------------------|
|         | Young leaves     | Old leaves       | Young leaves    | Old leaves       | Young leaves     | Old leaves       | Young leaves    | Old leaves       | Young leaves      | Old leaves         | Young leaves    | Old leaves       | Young leaves     | Old leaves       |
| Jan. 11 | 192.7 $\pm$ 3.3  | 131.5 $\pm$ 2.4  | 78.4 $\pm$ 1.3  | 95.5 $\pm$ 2.7   | 110.0 $\pm$ 4.6  | 129.4 $\pm$ 1.3  | 57.9 $\pm$ 0.9  | 118.8 $\pm$ 3    | 760.6 $\pm$ 14.5* | 456.8 $\pm$ 15.1   | 82.2 $\pm$ 1.4  | 52.3 $\pm$ 0.9   | 127.5 $\pm$ 6.0* | 38.0 $\pm$ 1.1   |
| Jan. 24 | 206.5 $\pm$ 8.7  | 92.5 $\pm$ 2.4   | 78.4 $\pm$ 3.3  | 107.0 $\pm$ 3.9* | 124.5 $\pm$ 2.7* | 125.6 $\pm$ 3.6  | 41.4 $\pm$ 1.4  | 74.2 $\pm$ 2.2   | 801.8 $\pm$ 37.7* | 874.5 $\pm$ 21.9   | 91.6 $\pm$ 3.8  | 91.5 $\pm$ 3.3   | 93.1 $\pm$ 3.9   | 51.2 $\pm$ 1.8   |
| Feb. 7  | 138.2 $\pm$ 4.4  | 92.0 $\pm$ 3.6   | 36.9 $\pm$ 1.2  | 47.9 $\pm$ 1.9   | 74.8 $\pm$ 2.2   | 143.0 $\pm$ 1.6  | 26.0 $\pm$ 0.9  | 8.1 $\pm$ 0.2    | 781.8 $\pm$ 25.8* | 857.9 $\pm$ 24.9   | 79.0 $\pm$ 3.3  | 89.4 $\pm$ 2.6   | 64.6 $\pm$ 2.1   | 61.5 $\pm$ 1.8   |
| Feb. 21 | 141.9 $\pm$ 4.1  | 106.6 $\pm$ 3.5  | 24.6 $\pm$ 0.7  | 42.8 $\pm$ 1.4   | 33.8 $\pm$ 0.8   | 142.8 $\pm$ 3.4  | 21.6 $\pm$ 0.8  | 10.1 $\pm$ 0.1   | 721.5 $\pm$ 28.1  | 697.0 $\pm$ 16.0   | 68.5 $\pm$ 2.0  | 94.7 $\pm$ 3.1   | 60.7 $\pm$ 1.8   | 75.5 $\pm$ 2.5   |
| Mar. 7  | 104.9 $\pm$ 3.9  | 90.7 $\pm$ 1.6   | 19.3 $\pm$ 0.7  | 43.1 $\pm$ 1.6   | 31.6 $\pm$ 0.8   | 151.5 $\pm$ 1.8  | 17.1 $\pm$ 0.3  | 10.5 $\pm$ 0.2   | 496.5 $\pm$ 8.4   | 911.5 $\pm$ 16.4   | 58.5 $\pm$ 1.6  | 94.4 $\pm$ 1.7   | 51.7 $\pm$ 1.9   | 68.7 $\pm$ 1.2   |
| Mar. 21 | 99.0 $\pm$ 3.0   | 92.4 $\pm$ 2.3   | 14.6 $\pm$ 0.4  | 17.8 $\pm$ 0.4   | 24.5 $\pm$ 1.1   | 166.4 $\pm$ 7.5  | 18.6 $\pm$ 0.4  | 21.0 $\pm$ 0.5   | 481.4 $\pm$ 20.2  | 975.8 $\pm$ 24.4   | 59.1 $\pm$ 2.0  | 107.1 $\pm$ 1.6  | 41.9 $\pm$ 1.3   | 65.7 $\pm$ 1.6   |
| Apr. 4  | 102.9 $\pm$ 3.1  | 90.8 $\pm$ 2.3   | 14.9 $\pm$ 0.3  | 20.3 $\pm$ 0.5   | 30.8 $\pm$ 1.0   | 155.6 $\pm$ 4.4  | 21.3 $\pm$ 0.6  | 23.4 $\pm$ 0.6   | 435.2 $\pm$ 13.1  | 979.1 $\pm$ 14.7   | 63.5 $\pm$ 2.7  | 118.9 $\pm$ 3.0  | 63.7 $\pm$ 1.4   | 70.7 $\pm$ 1.8   |
| Apr. 17 | 100.1 $\pm$ 3.0  | 103.4 $\pm$ 1.8  | 14.1 $\pm$ 0.4  | 41.3 $\pm$ 0.7   | 28.8 $\pm$ 1.2   | 154.1 $\pm$ 5.5  | 21.9 $\pm$ 0.7  | 36.0 $\pm$ 1.0   | 279.0 $\pm$ 11.7  | 955.6 $\pm$ 25.8   | 50.5 $\pm$ 1.2  | 117.3 $\pm$ 2.0  | 43.4 $\pm$ 1.3   | 75.8 $\pm$ 1.3   |
| May 1   | 81.3 $\pm$ 2.0   | 102.3 $\pm$ 3.1  | 13.4 $\pm$ 0.3  | 54.6 $\pm$ 1.6   | 23.6 $\pm$ 0.3   | 163.1 $\pm$ 6.4  | 20.7 $\pm$ 0.7  | 46.9 $\pm$ 1.4   | 297.0 $\pm$ 4.8   | 1059.0 $\pm$ 26.5  | 42.5 $\pm$ 0.6  | 111.8 $\pm$ 4.6  | 35.4 $\pm$ 0.9   | 66.0 $\pm$ 2.0   |
| May 15  | 93.9 $\pm$ 1.8   | 82.9 $\pm$ 0.9   | 12.9 $\pm$ 0.2  | 33.8 $\pm$ 0.4   | 22.0 $\pm$ 0.4   | 116.7 $\pm$ 3.8  | 13.2 $\pm$ 0.3  | 48.0 $\pm$ 1.4   | 297.9 $\pm$ 5.4   | 870.1 $\pm$ 13.1   | 46.2 $\pm$ 0.9  | 106.1 $\pm$ 2.2  | 25.4 $\pm$ 0.5   | 71.4 $\pm$ 1.1   |
| May 29  | 56.1 $\pm$ 1.4   | 40.2 $\pm$ 0.9   | 6.8 $\pm$ 0.2   | 31.6 $\pm$ 1.1   | 33.0 $\pm$ 1.1   | 144.8 $\pm$ 2.5  | 8.8 $\pm$ 0.3   | 42.9 $\pm$ 1.0   | 260.2 $\pm$ 7.5   | 936.3 $\pm$ 28.1   | 14.6 $\pm$ 0.4  | 114.0 $\pm$ 4.0  | 15.0 $\pm$ 0.5   | 76.4 $\pm$ 2.1   |
| Jun. 13 | 64.4 $\pm$ 2.0   | 42.3 $\pm$ 1.6   | 5.8 $\pm$ 0.2   | 27.8 $\pm$ 0.5   | 26.1 $\pm$ 0.8   | 133.8 $\pm$ 3.5  | 12.0 $\pm$ 0.5  | 36.5 $\pm$ 1.0   | 239.5 $\pm$ 6.0   | 1308.9 $\pm$ 43.2  | 14.7 $\pm$ 0.2  | 114.3 $\pm$ 2.2  | 9.7 $\pm$ 0.1    | 76.6 $\pm$ 2.2   |
| Jun. 28 | 51.4 $\pm$ 2.8   | 40.8 $\pm$ 1.5   | 5.6 $\pm$ 0.1   | 30.6 $\pm$ 1.1   | 51.5 $\pm$ 0.9   | 148.4 $\pm$ 2.2  | 25.9 $\pm$ 0.6  | 39.1 $\pm$ 0.7   | 338.6 $\pm$ 15.2  | 1341.5 $\pm$ 21.5  | 16.1 $\pm$ 0.2  | 131.3 $\pm$ 1.9* | 32.0 $\pm$ 0.4   | 107.7 $\pm$ 3.8  |
| Jul. 15 | 53.2 $\pm$ 1.5   | 28.0 $\pm$ 1.0   | 5.0 $\pm$ 0.1   | 34.6 $\pm$ 1.2   | 50.8 $\pm$ 1.7   | 128.6 $\pm$ 5    | 22.1 $\pm$ 0.4  | 47.8 $\pm$ 0.7   | 345.7 $\pm$ 10.0  | 1327.6 $\pm$ 57.1  | 18.4 $\pm$ 0.5  | 107.5 $\pm$ 1.6  | 43.9 $\pm$ 1.0   | 93.0 $\pm$ 2.9   |
| Jul. 29 | 47.7 $\pm$ 1.9   | 44.8 $\pm$ 0.9   | 4.8 $\pm$ 0.2   | 37.1 $\pm$ 0.8   | 46.6 $\pm$ 1.2   | 128.4 $\pm$ 4.2  | 22.9 $\pm$ 0.9  | 65.5 $\pm$ 2.0   | 300.3 $\pm$ 10.5  | 1389.5 $\pm$ 32.0  | 17.2 $\pm$ 0.7  | 107.5 $\pm$ 2.3  | 42.6 $\pm$ 0.7   | 93.0 $\pm$ 3.2   |
| Aug. 11 | 65.9 $\pm$ 1.6   | 46.7 $\pm$ 1.1   | 6.2 $\pm$ 0.2   | 37.3 $\pm$ 0.6   | 44.5 $\pm$ 0.8   | 136.5 $\pm$ 2.5  | 29.9 $\pm$ 0.7  | 59.9 $\pm$ 1.4   | 368.0 $\pm$ 15.1  | 1336.0 $\pm$ 36.1  | 30.0 $\pm$ 0.4  | 120.6 $\pm$ 2.8  | 66.1 $\pm$ 1.1   | 104.0 $\pm$ 2.4  |
| Aug. 24 | 63.7 $\pm$ 1.6   | 45.5 $\pm$ 0.7   | 36.8 $\pm$ 0.7  | 35.6 $\pm$ 1.2   | 54.9 $\pm$ 1.4   | 151.9 $\pm$ 4.7  | 36.4 $\pm$ 0.9  | 70.3 $\pm$ 2.5   | 381.6 $\pm$ 13.0  | 1417.1 $\pm$ 24.1  | 30.6 $\pm$ 0.5  | 122.2 $\pm$ 4.4  | 72.1 $\pm$ 1.1   | 101.8 $\pm$ 3.7  |
| Sep. 6  | 53.0 $\pm$ 1.0   | 53.2 $\pm$ 2.2   | 42.3 $\pm$ 1.2  | 80.3 $\pm$ 1.7   | 55.8 $\pm$ 1.1   | 272.7 $\pm$ 6.8* | 42.4 $\pm$ 1.1  | 83.6 $\pm$ 1.8   | 366.6 $\pm$ 9.2   | 1954.7 $\pm$ 60.6* | 32.0 $\pm$ 1.2  | 126.8 $\pm$ 2.4  | 71.6 $\pm$ 1.8   | 143.3 $\pm$ 4.7  |
| Sep. 20 | 80.1 $\pm$ 2.3   | 67.6 $\pm$ 1.5   | 51.3 $\pm$ 1.5  | 96.0 $\pm$ 4.0   | 68.0 $\pm$ 2.2   | 278.6 $\pm$ 9.9* | 54.3 $\pm$ 1.6  | 84.6 $\pm$ 3.6   | 469.4 $\pm$ 18.3  | 1450.0 $\pm$ 46.4  | 45.2 $\pm$ 1.3  | 119.7 $\pm$ 5.0  | 82.7 $\pm$ 1.6   | 141.8 $\pm$ 4.3  |
| Oct. 4  | 83.3 $\pm$ 1.3   | 71.0 $\pm$ 1.2   | 49.8 $\pm$ 1.2  | 98.2 $\pm$ 1.7   | 69.0 $\pm$ 1.2   | 267.0 $\pm$ 6.7* | 53.4 $\pm$ 0.9  | 88.4 $\pm$ 1.6   | 465.8 $\pm$ 7.5   | 1198.8 $\pm$ 21.6  | 48.9 $\pm$ 1.2  | 117.6 $\pm$ 3.8  | 88.4 $\pm$ 1.4   | 142.9 $\pm$ 3.9  |
| Oct. 19 | 120.6 $\pm$ 4.1  | 101.0 $\pm$ 3.6  | 59.8 $\pm$ 2.6  | 109.6 $\pm$ 3.9* | 82.5 $\pm$ 1.7   | 234.8 $\pm$ 4.5  | 66.1 $\pm$ 2.8  | 80.9 $\pm$ 3.5   | 611.8 $\pm$ 13.5  | 1226.4 $\pm$ 40.5  | 53.8 $\pm$ 1.2  | 122.8 $\pm$ 2.7  | 87.7 $\pm$ 2.1   | 150.6 $\pm$ 2.4* |
| Nov. 1  | 115.8 $\pm$ 2.9  | 98.2 $\pm$ 1.3   | 56.3 $\pm$ 1.4  | 108.1 $\pm$ 3.6* | 81.2 $\pm$ 1.8   | 215.3 $\pm$ 7.5  | 52.1 $\pm$ 1.7  | 90.2 $\pm$ 1.7   | 621.9 $\pm$ 19.9  | 1324.3 $\pm$ 25.2  | 72.4 $\pm$ 2.8  | 120.5 $\pm$ 3.5  | 83.6 $\pm$ 1.3   | 141.9 $\pm$ 4.7  |
| Nov. 16 | 179.3 $\pm$ 5.2  | 101.8 $\pm$ 3.4  | 53.3 $\pm$ 2.6  | 106.7 $\pm$ 3.5* | 89.0 $\pm$ 2.0   | 171.9 $\pm$ 2.6  | 94.4 $\pm$ 2.7* | 145.4 $\pm$ 4.8* | 683.9 $\pm$ 19.8  | 1250.4 $\pm$ 41.3  | 98.4 $\pm$ 3.2* | 107.4 $\pm$ 1.8  | 87.2 $\pm$ 2.5   | 93.2 $\pm$ 3.1   |
| Nov. 29 | 179.3 $\pm$ 7.5  | 129.1 $\pm$ 4.3  | 53.4 $\pm$ 1.2  | 107.3 $\pm$ 3.5* | 78.6 $\pm$ 1.9   | 147.9 $\pm$ 4.6  | 94.4 $\pm$ 1.6* | 141.3 $\pm$ 4.9* | 710.8 $\pm$ 33.4  | 696.2 $\pm$ 17.4   | 98.6 $\pm$ 4.1* | 110.5 $\pm$ 2.5  | 95.3 $\pm$ 4.0   | 72.9 $\pm$ 3.1   |
| Dec. 13 | 272.8 $\pm$ 8.7* | 163.7 $\pm$ 3.1* | 88.9 $\pm$ 2.8* | 93.9 $\pm$ 3.7   | 98.4 $\pm$ 1.5   | 131.7 $\pm$ 2.2  | 96.8 $\pm$ 2.1* | 145.4 $\pm$ 5.7* | 717.1 $\pm$ 8.6   | 783.3 $\pm$ 18.0   | 84.8 $\pm$ 3.6  | 107.3 $\pm$ 3.1  | 102.0 $\pm$ 3.3  | 74.2 $\pm$ 1.4   |
| Dec. 28 | 201.6 $\pm$ 5.8  | 138.9 $\pm$ 1.8  | 85.8 $\pm$ 1.6* | 100.8 $\pm$ 3.3  | 105.3 $\pm$ 1.6  | 117.3 $\pm$ 1.6  | 69.0 $\pm$ 2.7  | 122.5 $\pm$ 5.4  | 785.9 $\pm$ 25.1* | 692.2 $\pm$ 13.2   | 89.4 $\pm$ 2.6  | 82.3 $\pm$ 1.1   | 135.1 $\pm$ 4.6* | 63.0 $\pm$ 0.8   |

Results are presented as means  $\pm$  SD of the samples collected at different dates in a certain forest plot. Values marked with \* in the same column indicate the highest ( $p < 0.05$ ) amounts in samples.

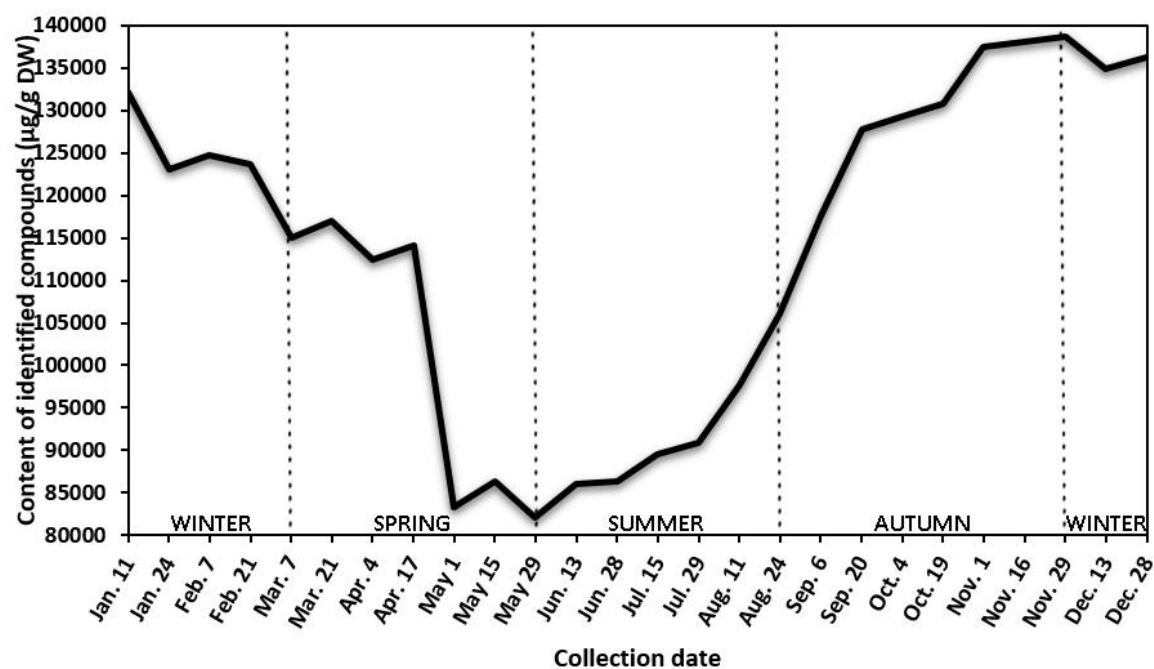

**Figure S1.** Variation of total identified secondary metabolites (µg/g DW) in lingonberry leaves, collected throughout one year.



**Table S8.** Contents of simple phenolics and A-type proanthocyanidins ( $\mu\text{g/g DW} \pm \text{SD}$ ) in lingonberry leaves, collected at different locations.

| Location       | Arbutin              | Hydroquinone      | 2-O-Caffeoylarbutin | Procyanidin A1      | Procyanidin A2     | Procyanidin A4   |
|----------------|----------------------|-------------------|---------------------|---------------------|--------------------|------------------|
| Apūniškis      | 65172.6 $\pm$ 1448.0 | 121.9 $\pm$ 2.5   | 3375.1 $\pm$ 152.8  | 5079.8 $\pm$ 36.8   | 797.4 $\pm$ 52.7   | 72.9 $\pm$ 3.0   |
| Plunksnuočiai  | 58029.1 $\pm$ 2840.6 | 423.2 $\pm$ 14.4* | 1564.5 $\pm$ 77.3   | 4421.8 $\pm$ 169.4  | 1009.8 $\pm$ 25.6  | 37.8 $\pm$ 3.9   |
| Šakarva        | 63442.3 $\pm$ 2851.0 | 128.6 $\pm$ 2.7   | 2649.2 $\pm$ 92.3   | 4515.8 $\pm$ 271.6  | 1115.3 $\pm$ 72.9  | 63.8 $\pm$ 1.8   |
| Andrioniškis   | 62054.5 $\pm$ 2476.8 | 160.9 $\pm$ 2.9   | 2078.9 $\pm$ 98.4   | 3965.0 $\pm$ 251.5  | 824.0 $\pm$ 66.1   | 51.5 $\pm$ 2.1   |
| Jurgionys      | 98000.9 $\pm$ 497.9* | 269.3 $\pm$ 16.3  | 4039.4 $\pm$ 171.3  | 5025.8 $\pm$ 315.7  | 1187.7 $\pm$ 66.5  | 56.1 $\pm$ 3.3   |
| Kernai         | 70986.5 $\pm$ 1830.9 | 215.6 $\pm$ 6.7   | 4288.6 $\pm$ 98.5*  | 4103.8 $\pm$ 84.1   | 622.0 $\pm$ 19.4   | 36.0 $\pm$ 0.8   |
| Žadeikiai      | 67230.0 $\pm$ 3094.0 | 83.7 $\pm$ 2.6    | 3265.8 $\pm$ 193.4  | 4082.7 $\pm$ 226.1  | 802.9 $\pm$ 45.0   | 62.1 $\pm$ 3.6   |
| Galvokai       | 75229.3 $\pm$ 1447.8 | 92.3 $\pm$ 0.3    | 4507.0 $\pm$ 239.3* | 3592.1 $\pm$ 60.9   | 334.9 $\pm$ 0.8    | 25.4 $\pm$ 0.4   |
| Giteniškė      | 59305.5 $\pm$ 1944.2 | 449.6 $\pm$ 2.1*  | 842.7 $\pm$ 36.7    | 4943.0 $\pm$ 182.7  | 722.3 $\pm$ 18.7   | 99.9 $\pm$ 3.7*  |
| Šalčininkėliai | 67886.3 $\pm$ 2689.8 | 93.2 $\pm$ 0.1    | 2338.2 $\pm$ 73.9   | 4573.5 $\pm$ 168.8  | 762.2 $\pm$ 38.6   | 67.9 $\pm$ 2.6   |
| Bitėnai        | 46681.1 $\pm$ 423.1  | 217.8 $\pm$ 0.9   | 1742.4 $\pm$ 18.7   | 3411.4 $\pm$ 22.3   | 540.1 $\pm$ 18.1   | 31.0 $\pm$ 0.4   |
| Pagramantis    | 70039.5 $\pm$ 1212.1 | 92.6 $\pm$ 2.9    | 2517.5 $\pm$ 53.1   | 3298.2 $\pm$ 2.6    | 4677.8 $\pm$ 0.3*  | 68.5 $\pm$ 2.1   |
| Kūprė          | 54883.3 $\pm$ 1653.7 | 260.9 $\pm$ 13.2  | 1481.6 $\pm$ 13.9   | 4927.3 $\pm$ 118.1  | 682.9 $\pm$ 4.4    | 95.6 $\pm$ 4.1   |
| Brūknyne       | 78305.7 $\pm$ 2069.3 | 144.6 $\pm$ 5.9   | 2886 $\pm$ 133.9    | 5235.8 $\pm$ 97.3*  | 959.5 $\pm$ 51.6   | 78.0 $\pm$ 4.9   |
| Viršilai       | 68555.9 $\pm$ 743.6  | 179.0 $\pm$ 3.9   | 1902.9 $\pm$ 51.1   | 5193.5 $\pm$ 158.7* | 1125.0 $\pm$ 42.6  | 53.3 $\pm$ 0.9   |
| Labanoras (a)  | 61384.8 $\pm$ 811.0  | 259.4 $\pm$ 7.5   | 40.7 $\pm$ 0.1      | 3985.0 $\pm$ 59.5   | 1661.7 $\pm$ 42.5  | 96.6 $\pm$ 4.0*  |
| Labanoras (b)  | 65985.3 $\pm$ 859.9  | 141.5 $\pm$ 2.6   | 3117.3 $\pm$ 118.7  | 4669.9 $\pm$ 60.8   | 936.0 $\pm$ 20.5   | 84.3 $\pm$ 3.3   |
| Komarinė       | 51452.3 $\pm$ 616.9  | 210.9 $\pm$ 1.4   | 1581.8 $\pm$ 34.7   | 3829.6 $\pm$ 37.3   | 662.3 $\pm$ 2.5    | 37.4 $\pm$ 1.5   |
| Marcinkonys    | 58928.3 $\pm$ 2507.3 | 246.6 $\pm$ 5.2   | 1583.7 $\pm$ 58.1   | 4000.9 $\pm$ 23.3   | 782.2 $\pm$ 4.6    | 47.4 $\pm$ 2.3   |
| Šilainė        | 70974 $\pm$ 3069.6   | 289.8 $\pm$ 14.2  | 525.9 $\pm$ 28.4    | 5060.3 $\pm$ 182.6  | 625.1 $\pm$ 10.0   | 88.8 $\pm$ 5.1   |
| Smėlynė        | 75292.1 $\pm$ 4063.1 | 123.6 $\pm$ 6.9   | 3252.9 $\pm$ 13.6   | 4748.3 $\pm$ 192.9  | 1680.1 $\pm$ 73.4  | 85.3 $\pm$ 0.5   |
| Ilgalaukiai    | 64711.6 $\pm$ 2566.1 | 235.2 $\pm$ 12.2  | 2572.0 $\pm$ 67.1   | 5723.2 $\pm$ 243.0* | 1271.1 $\pm$ 66.7  | 76.7 $\pm$ 5.2   |
| Vosniūnai      | 70645.2 $\pm$ 2058.3 | 72.3 $\pm$ 1.5    | 3526.4 $\pm$ 120.2  | 4621.1 $\pm$ 77.6   | 508.2 $\pm$ 16.3   | 63.1 $\pm$ 0.8   |
| Kukuliškiai    | 61503.5 $\pm$ 2353.3 | 173.3 $\pm$ 8.9   | 1507.6 $\pm$ 66.1   | 4426.7 $\pm$ 207.9  | 630.3 $\pm$ 43.9   | 44.3 $\pm$ 2.4   |
| Tolkūnai       | 85325.6 $\pm$ 2614.3 | 190.1 $\pm$ 5.4   | 3015.7 $\pm$ 131.2  | 5096.4 $\pm$ 208.5  | 1220.6 $\pm$ 99.8  | 85.8 $\pm$ 1.8   |
| Bakūriškis     | 70383.1 $\pm$ 2201.9 | 231.9 $\pm$ 5.2   | 3394.7 $\pm$ 115.7  | 2474.9 $\pm$ 86.1   | 2280.1 $\pm$ 120.2 | 44.0 $\pm$ 1.3   |
| Šilinė         | 62953.5 $\pm$ 1657.3 | 215.4 $\pm$ 5.0   | 1874.8 $\pm$ 85.3   | 3553.1 $\pm$ 84.1   | 499.6 $\pm$ 3.9    | 36.2 $\pm$ 1.5   |
| Tyrelis        | 71061.4 $\pm$ 1029.7 | 139.5 $\pm$ 2.0   | 2684.5 $\pm$ 75.3   | 3257.1 $\pm$ 92.2   | 4546.9 $\pm$ 88.6* | 107.9 $\pm$ 4.4* |
| Pažemys        | 40280.9 $\pm$ 1071.5 | 152.9 $\pm$ 1.5   | 1403.5 $\pm$ 68.5   | 4411.7 $\pm$ 130.2  | 625.7 $\pm$ 16.7   | 62.3 $\pm$ 1.0   |

Results are presented as means  $\pm$  SD of the samples collected at different locations at the end of September 2019. Values marked with \* in the same column indicate the highest ( $p < 0.05$ ) amounts in samples.

**Table S9.** Contents of catechins and B-type proanthocyanidins ( $\mu\text{g/g DW} \pm \text{SD}$ ) in lingonberry leaves, collected at different locations.

| Location       | (+)-Catechin         | (-)-Epicatechin    | Procyanidin B1      | Procyanidin B2      | Procyanidin B3      | Procyanidin C1      |
|----------------|----------------------|--------------------|---------------------|---------------------|---------------------|---------------------|
| Apūniškis      | 13297.9 $\pm$ 124.7* | 3375.1 $\pm$ 152.8 | 5810.5 $\pm$ 23.7*  | 2294.4 $\pm$ 63.0   | 6874.0 $\pm$ 214.4* | 4130.0 $\pm$ 148.6  |
| Plunksnuočiai  | 6652.1 $\pm$ 158.9   | 1564.5 $\pm$ 77.3  | 3118.3 $\pm$ 82.1   | 2079.4 $\pm$ 41.4   | 4209.0 $\pm$ 213.8  | 2929.4 $\pm$ 138.9  |
| Šakarva        | 9848.1 $\pm$ 397.9   | 2649.2 $\pm$ 15.5  | 4422.0 $\pm$ 28.6   | 2597.2 $\pm$ 107.1  | 4975.3 $\pm$ 160.1  | 3024.7 $\pm$ 195.1  |
| Andrioniškis   | 7432.6 $\pm$ 189.1   | 2078.9 $\pm$ 98.4  | 3325.9 $\pm$ 129.1  | 2183.5 $\pm$ 43.3   | 4225.0 $\pm$ 22.4   | 2762.6 $\pm$ 21.1   |
| Jurgionys      | 10043.1 $\pm$ 357.6  | 4039.4 $\pm$ 225.0 | 3748.7 $\pm$ 147.7  | 2564.2 $\pm$ 125.8  | 4240.0 $\pm$ 212.5  | 3465.8 $\pm$ 44.5   |
| Kernai         | 7360.1 $\pm$ 48.9    | 4288.6 $\pm$ 98.5* | 5100.0 $\pm$ 182.7  | 1401.5 $\pm$ 19.1   | 3624.6 $\pm$ 179.0  | 2927.1 $\pm$ 4.3    |
| Žadeikiai      | 11232.0 $\pm$ 119.6  | 3265.8 $\pm$ 116.6 | 3243.8 $\pm$ 118.8  | 2934.2 $\pm$ 153.7  | 5990.0 $\pm$ 331.2  | 3307.7 $\pm$ 146    |
| Galvokai       | 11192.2 $\pm$ 497.8  | 4506.9 $\pm$ 85.7* | 3743.5 $\pm$ 133.5  | 1428.9 $\pm$ 3.5    | 5087.3 $\pm$ 88.1   | 2423.3 $\pm$ 46.6   |
| Giteniškė      | 9930.6 $\pm$ 235.3   | 842.7 $\pm$ 36.7   | 3835.5 $\pm$ 138.6  | 1283.9 $\pm$ 20.1   | 4258.7 $\pm$ 201.3  | 2404.7 $\pm$ 100.4  |
| Šalčininkėliai | 12078.2 $\pm$ 428.1  | 2338.2 $\pm$ 73.9  | 4248.1 $\pm$ 188.6  | 2548.7 $\pm$ 62.7   | 6231.6 $\pm$ 297.1  | 2861.8 $\pm$ 121.0  |
| Bitėnai        | 3429.6 $\pm$ 127     | 1742.4 $\pm$ 18.7  | 1112.4 $\pm$ 19.7   | 1430.4 $\pm$ 40.5   | 2818.6 $\pm$ 16.7   | 1818.4 $\pm$ 15.1   |
| Pagramantis    | 7353.1 $\pm$ 253.3   | 2517.5 $\pm$ 53.1  | 4843.7 $\pm$ 231.5  | 6990.2 $\pm$ 129.2* | 3822.8 $\pm$ 55.6   | 4392.1 $\pm$ 80.6   |
| Kūprė          | 9301.8 $\pm$ 259.8   | 1481.6 $\pm$ 90.6  | 5099.7 $\pm$ 207.8  | 1750.0 $\pm$ 97.1   | 5937.2 $\pm$ 100.2  | 3375.7 $\pm$ 162.3  |
| Bruknynė       | 12828.7 $\pm$ 239.2  | 2886.0 $\pm$ 133.9 | 4831.9 $\pm$ 123.8  | 2874.0 $\pm$ 59.0   | 6767.8 $\pm$ 83.1*  | 3293.7 $\pm$ 162.7  |
| Viršilai       | 7535.7 $\pm$ 227.3   | 1957.2 $\pm$ 51.2  | 3842.0 $\pm$ 177.8  | 1891.5 $\pm$ 63.9   | 3389.3 $\pm$ 170.6  | 2433.5 $\pm$ 70.2   |
| Labanoras (a)  | 9255.6 $\pm$ 26.4    | 40.7 $\pm$ 0.1     | 5172.6 $\pm$ 133.0  | 4281.5 $\pm$ 130.4  | 5193.4 $\pm$ 89.4   | 2519.4 $\pm$ 126.6  |
| Labanoras (b)  | 11614.9 $\pm$ 444.7  | 3117.2 $\pm$ 42.0  | 6181.6 $\pm$ 110.4* | 2629.2 $\pm$ 49.0   | 5834.7 $\pm$ 144.6  | 3837.1 $\pm$ 82.5   |
| Komarinė       | 6188.1 $\pm$ 154.2   | 1581.8 $\pm$ 34.7  | 2853.5 $\pm$ 64.2   | 1615.7 $\pm$ 33.9   | 3304.7 $\pm$ 33.1   | 2529.6 $\pm$ 0.2    |
| Marcinkonys    | 8306.6 $\pm$ 263.9   | 1583.7 $\pm$ 58.1  | 4465.1 $\pm$ 187.2  | 2599.6 $\pm$ 55.5   | 4966.6 $\pm$ 44.3   | 3233.2 $\pm$ 71.8   |
| Šilainė        | 14101.3 $\pm$ 443.6* | 525.9 $\pm$ 28.4   | 4684.7 $\pm$ 88.3   | 2403.5 $\pm$ 80.1   | 7135.9 $\pm$ 202.6* | 2894.2 $\pm$ 191.2  |
| Smėlynė        | 13235.7 $\pm$ 187.9* | 3252.9 $\pm$ 90.4  | 6044.4 $\pm$ 143.5* | 3832.2 $\pm$ 168.9  | 6213.6 $\pm$ 330.9  | 5053.3 $\pm$ 137.9* |
| Ilgalaukiai    | 12446.1 $\pm$ 143.9  | 2572.0 $\pm$ 67.1  | 4069.5 $\pm$ 176.9  | 2479.9 $\pm$ 99.7   | 5732.8 $\pm$ 125.2  | 3178.9 $\pm$ 142.6  |
| Vosniūnai      | 11493.0 $\pm$ 148.5  | 3526.4 $\pm$ 43.4  | 4354.3 $\pm$ 98.6   | 1483.1 $\pm$ 33.6   | 4640.4 $\pm$ 182.6  | 3719.1 $\pm$ 95.2   |
| Kadagnai       | 7637.5 $\pm$ 347.7   | 1507.6 $\pm$ 66.1  | 3815.7 $\pm$ 76.4   | 1640.7 $\pm$ 39.4   | 4798.2 $\pm$ 242.2  | 3048.2 $\pm$ 146.4  |
| Tolkūnai       | 11483.9 $\pm$ 178.1  | 3015.7 $\pm$ 131.2 | 4864.7 $\pm$ 119.4  | 2877.0 $\pm$ 146.7  | 4870.3 $\pm$ 199.4  | 4620.5 $\pm$ 59.8*  |
| Bakūriškis     | 6335.4 $\pm$ 198.9   | 3394.7 $\pm$ 115.7 | 3670.7 $\pm$ 149.1  | 5318.1 $\pm$ 163.1  | 3690.7 $\pm$ 83.5   | 4292.3 $\pm$ 234.8  |
| Šilinė         | 7711.0 $\pm$ 141.8   | 1847.7 $\pm$ 46.9  | 4305.2 $\pm$ 50.8   | 1652.5 $\pm$ 88.8   | 4717.8 $\pm$ 65.8   | 2777.6 $\pm$ 122.3  |
| Tyrelis        | 7951.3 $\pm$ 262.5   | 2684.5 $\pm$ 75.3  | 5120.1 $\pm$ 142.6  | 6883.3 $\pm$ 225.3* | 3768.3 $\pm$ 91.3   | 4237.6 $\pm$ 78.3   |
| Pažemys        | 10598.9 $\pm$ 148.9  | 1403.5 $\pm$ 68.5  | 3418.8 $\pm$ 161.3  | 1736.4 $\pm$ 69.5   | 5933.4 $\pm$ 64.3   | 2697.2 $\pm$ 134.8  |

Results are presented as means  $\pm$  SD of the samples collected at different locations at the end of September 2019. Values marked with \* in the same column indicate the highest ( $p < 0.05$ ) amounts in samples.

**Table S10.** Contents of flavonol aglycones and phenolic acids ( $\mu\text{g/g DW} \pm \text{SD}$ ) in lingonberry leaves, collected at different locations.

| Location       | Quercetin        | Kaempferol     | Chlorogenic acid    | Cryptochlorogenic acid | Neochlorogenic acid | <i>p</i> -Coumaric acid |
|----------------|------------------|----------------|---------------------|------------------------|---------------------|-------------------------|
| Apūniškis      | 69.1 $\pm$ 4.1   | 3.8 $\pm$ 0.1  | 553.6 $\pm$ 10.4    | 1044.5 $\pm$ 11.9      | 58.0 $\pm$ 1.9      | 382.9 $\pm$ 20.3*       |
| Plunksnuočiai  | 58.8 $\pm$ 0.9   | ND             | 3382.1 $\pm$ 115.2* | 326.8 $\pm$ 11.7       | 24.8 $\pm$ 0.2      | 351.0 $\pm$ 18.1        |
| Šakarva        | 64.5 $\pm$ 0.2   | ND             | 2223.7 $\pm$ 52.1   | 405.4 $\pm$ 22.9       | 30.8 $\pm$ 1.0      | 287.1 $\pm$ 8.0         |
| Andrioniškis   | 70.5 $\pm$ 2.0   | 4.3 $\pm$ 0.1  | 1176.4 $\pm$ 8.2    | 936.9 $\pm$ 54.4       | 47.6 $\pm$ 2.7      | 214.4 $\pm$ 3.1         |
| Jurgionys      | 67.2 $\pm$ 3.5   | NQ             | 152.4 $\pm$ 3.4     | 784.6 $\pm$ 16.7       | 59.2 $\pm$ 1.1      | 143.4 $\pm$ 4.4         |
| Kernai         | 62.3 $\pm$ 0.5   | 3.8 $\pm$ 0.0  | 2430.4 $\pm$ 7.8    | 798.9 $\pm$ 4.4        | 42.7 $\pm$ 0.1      | 130.8 $\pm$ 1.5         |
| Žadeikiai      | 75.8 $\pm$ 1.9   | NQ             | 489.0 $\pm$ 19.3    | 1008.8 $\pm$ 35.5      | 109.7 $\pm$ 4.3     | 129.0 $\pm$ 5.2         |
| Galvokai       | 71.7 $\pm$ 2.8   | ND             | 464.8 $\pm$ 11.4    | 1471.1 $\pm$ 14.6      | 138.4 $\pm$ 0.1     | 254.2 $\pm$ 6.7         |
| Giteniškė      | 75.5 $\pm$ 1.7   | 3.9 $\pm$ 0.1  | 906.0 $\pm$ 37.7    | 563.8 $\pm$ 17.3       | 39.2 $\pm$ 0.5      | 262.6 $\pm$ 12.5        |
| Šalčininkėliai | 73.7 $\pm$ 0.6   | 4.2 $\pm$ 0.0  | 745.5 $\pm$ 26.2    | 963.0 $\pm$ 51.5       | 90.2 $\pm$ 4.7      | 271.9 $\pm$ 2.9         |
| Bitėnai        | 62.5 $\pm$ 0.4   | NQ             | 321.7 $\pm$ 2.9     | 161.7 $\pm$ 0.9        | 21.4 $\pm$ 1.4      | 289.6 $\pm$ 3.4         |
| Pagramantis    | 64.1 $\pm$ 0.2   | ND             | 1481.8 $\pm$ 10.8   | 468.1 $\pm$ 3.1        | 42.8 $\pm$ 0.3      | 254.3 $\pm$ 1.7         |
| Kūprė          | 80.1 $\pm$ 3.8   | 4.2 $\pm$ 0.1  | 1473.0 $\pm$ 41.3   | 947.2 $\pm$ 32.4       | 46.3 $\pm$ 1.4      | 342.3 $\pm$ 8.4         |
| Bruknynė       | 77.9 $\pm$ 0.7   | 4.2 $\pm$ 0.3  | 723.7 $\pm$ 16.9    | 998.8 $\pm$ 1.5        | 97.7 $\pm$ 4.4      | 295.5 $\pm$ 10.9        |
| Viršilai       | 62.5 $\pm$ 2.7   | NQ             | 3188.6 $\pm$ 153.0  | 670.8 $\pm$ 1.3        | 37.4 $\pm$ 3.0      | 156.6 $\pm$ 4.0         |
| Labanoras (a)  | 73.3 $\pm$ 0.2   | 3.9 $\pm$ 0.2  | 3510.7 $\pm$ 22.0*  | 386.1 $\pm$ 0.4        | 66.7 $\pm$ 2.7      | 98.1 $\pm$ 0.5          |
| Labanoras (b)  | 75.6 $\pm$ 0.8   | 3.9 $\pm$ 0.2  | 3346.6 $\pm$ 71.9*  | 453.5 $\pm$ 8          | 30.6 $\pm$ 0.5      | 238 $\pm$ 5.7           |
| Komarinė       | 78.1 $\pm$ 1.3   | 4.2 $\pm$ 0.2  | 1690.9 $\pm$ 46.4   | 450.8 $\pm$ 5.5        | 32.7 $\pm$ 0.8      | 179.4 $\pm$ 1.1         |
| Marcinkonys    | 121.1 $\pm$ 5.9* | 7.8 $\pm$ 0.4* | 1485.1 $\pm$ 36.7   | 240.0 $\pm$ 2.5        | 27.1 $\pm$ 0.2      | 199.8 $\pm$ 3.1         |
| Šilainė        | 92.5 $\pm$ 1.3   | 5.4 $\pm$ 0.2  | 2104.1 $\pm$ 122.4  | 598.1 $\pm$ 10.5       | 38.5 $\pm$ 1.2      | 365.2 $\pm$ 22.0        |
| Smėlynė        | 90.6 $\pm$ 1.0   | 4.1 $\pm$ 0.1  | 3304.2 $\pm$ 163.9* | 1830.1 $\pm$ 20.3*     | 113.8 $\pm$ 0.7     | 353.0 $\pm$ 7.4         |
| Ilgalaukiai    | 69.6 $\pm$ 1.5   | 4.1 $\pm$ 0.2  | 799.8 $\pm$ 36.4    | 991.0 $\pm$ 29.6       | 44.6 $\pm$ 0.3      | 245.0 $\pm$ 8.0         |
| Vosniūnai      | 70.4 $\pm$ 0.9   | 3.7 $\pm$ 0.2  | 913.7 $\pm$ 26.8    | 849.5 $\pm$ 18.0       | 70.5 $\pm$ 3.4      | 252.9 $\pm$ 7.5         |
| Kadagynai      | 73.1 $\pm$ 1.9   | 4.1 $\pm$ 0.1  | 2192.5 $\pm$ 89.7   | 693.6 $\pm$ 21.1       | 41.0 $\pm$ 2.1      | 223.9 $\pm$ 4.9         |
| Tolkūnai       | 82.4 $\pm$ 4.0   | 4.1 $\pm$ 0.2  | 395.1 $\pm$ 16.2    | 470.9 $\pm$ 28.8       | 46.3 $\pm$ 1.8      | 411.9 $\pm$ 10.7*       |
| Bakūriškis     | 94.4 $\pm$ 1.1   | 4.5 $\pm$ 0.0  | 151.6 $\pm$ 0.2     | 1532.4 $\pm$ 32.9      | 161.7 $\pm$ 1.2*    | 400.3 $\pm$ 15.5*       |
| Šilinė         | 72.8 $\pm$ 1.7   | 3.7 $\pm$ 0.2  | 500.2 $\pm$ 29.3    | 1002.4 $\pm$ 9.9       | 89.7 $\pm$ 5.3      | 203.4 $\pm$ 10.1        |
| Tyrelis        | 65.2 $\pm$ 0.4   | 3.6 $\pm$ 0.1  | 1157.2 $\pm$ 10.8   | 543.0 $\pm$ 8.8        | 38.3 $\pm$ 1.3      | 270.9 $\pm$ 6.5         |
| Pažemys        | 85.8 $\pm$ 0.6   | 4.8 $\pm$ 0.0  | 1362.7 $\pm$ 63.3   | 1477.1 $\pm$ 14.3      | 75.5 $\pm$ 4.3      | 154.9 $\pm$ 3.4         |

Results are presented as means  $\pm$  SD of the samples collected at different locations at the end of September 2019. Values marked with \* in the same column indicate the highest ( $p < 0.05$ ) amounts in samples. ND—not detected, NQ—not quantified (amount below LOQ).

**Table S11.** Contents of kaempferol and quercetin glycosides ( $\mu\text{g/g DW} \pm \text{SD}$ ) in lingonberry leaves, collected at different locations.

| Location       | Nicotiflorin      | Astragalin       | Afzelin          | Quercitrin         | Quercetin-HMG-rhamnoside | 6''-O-acetylisoquercitrin |
|----------------|-------------------|------------------|------------------|--------------------|--------------------------|---------------------------|
| Apūniškis      | 66.6 $\pm$ 3.3    | 73.8 $\pm$ 4.2   | 66.8 $\pm$ 2.6   | 889.9 $\pm$ 45.9   | 1284.6 $\pm$ 44.7        | 52.2 $\pm$ 2.5            |
| Plunksnuočiai  | 3.9 $\pm$ 0.8     | 10.3 $\pm$ 0.1   | 37.2 $\pm$ 1.5   | 637.4 $\pm$ 32.7   | 1092.3 $\pm$ 48.2        | 10.4 $\pm$ 0.2            |
| Šakarva        | 72.5 $\pm$ 2.1    | 31.4 $\pm$ 1.2   | 101.2 $\pm$ 1.4  | 1449.8 $\pm$ 40.2  | 1197.2 $\pm$ 22.1        | 26.7 $\pm$ 0.7            |
| Andrioniškis   | 104.4 $\pm$ 5.3   | 50.8 $\pm$ 2.6   | 58.5 $\pm$ 0.1   | 1005.9 $\pm$ 24.5  | 1327.0 $\pm$ 40.8        | 32.5 $\pm$ 1.0            |
| Jurgionys      | 122.1 $\pm$ 5.9   | 81.1 $\pm$ 2.5   | 51.3 $\pm$ 1.3   | 296.2 $\pm$ 33.9   | 741.5 $\pm$ 9.8          | 26.8 $\pm$ 0.6            |
| Kernai         | 78.7 $\pm$ 5.4    | 55.5 $\pm$ 2.6   | 124.1 $\pm$ 4.0  | 1240.0 $\pm$ 60.7  | 1685.1 $\pm$ 84.7        | 21.6 $\pm$ 1.1            |
| Žadeikiai      | NQ                | 21.6 $\pm$ 0.3   | 47.0 $\pm$ 3.5   | 1067.6 $\pm$ 16.9  | 2022.0 $\pm$ 66.3        | 25.4 $\pm$ 0.9            |
| Galvokai       | 3.3 $\pm$ 1.8     | 35.0 $\pm$ 1.5   | 69.8 $\pm$ 1.5   | 950.2 $\pm$ 37.9   | 1392.0 $\pm$ 46.4        | 20.2 $\pm$ 0.1            |
| Giteniškė      | 52.0 $\pm$ 2.7    | 42.8 $\pm$ 2.4   | 40.9 $\pm$ 2.4   | 840.9 $\pm$ 42.5   | 1092.8 $\pm$ 68.1        | 31.7 $\pm$ 1.2            |
| Šalčininkėliai | 78.6 $\pm$ 1.0    | 61.0 $\pm$ 0.4   | 70.8 $\pm$ 1.9   | 974.1 $\pm$ 12.1   | 1551.9 $\pm$ 33.7        | 46.6 $\pm$ 2.8            |
| Bitėnai        | 34.5 $\pm$ 1.2    | 18.0 $\pm$ 0.0   | 26.5 $\pm$ 1.1   | 703.7 $\pm$ 2.3    | 778.2 $\pm$ 8.7          | 11.2 $\pm$ 0.1            |
| Pagramantis    | 87.5 $\pm$ 4.0    | 60.1 $\pm$ 2.5   | 63.4 $\pm$ 2.1   | 840.3 $\pm$ 36.6   | 1394.2 $\pm$ 50.6        | 28.9 $\pm$ 1.6            |
| Kūprė          | 4.1 $\pm$ 0.6     | 16.9 $\pm$ 0.2   | 58.5 $\pm$ 3.6   | 845.1 $\pm$ 28.8   | 1738.6 $\pm$ 76.6        | 56.7 $\pm$ 2.6            |
| Bruknynė       | 98.4 $\pm$ 2.5    | 70.7 $\pm$ 1.7   | 74.9 $\pm$ 0.9   | 967.9 $\pm$ 222.1  | 1584.2 $\pm$ 21.8        | 47.9 $\pm$ 0.4            |
| Viršilai       | NQ                | 6.6 $\pm$ 0.7    | 37.8 $\pm$ 2.9   | 699.9 $\pm$ 36.9   | 1214.0 $\pm$ 20.3        | 18.3 $\pm$ 0.3            |
| Labanoras (a)  | 49.3 $\pm$ 0.2    | 32.6 $\pm$ 0.2   | 89.4 $\pm$ 0.2   | 3125.3 $\pm$ 17.8* | 71.3 $\pm$ 0.9           | 51.6 $\pm$ 0.2            |
| Labanoras (b)  | 84.5 $\pm$ 3.1    | 54.6 $\pm$ 1.6   | 141.9 $\pm$ 8.1  | 1962.1 $\pm$ 76.2  | 898.7 $\pm$ 17.3         | 46.6 $\pm$ 2.6            |
| Komarinė       | 157.8 $\pm$ 13.1  | 79.7 $\pm$ 2.8   | 56.1 $\pm$ 0.9   | 980.5 $\pm$ 65.3   | 1537.4 $\pm$ 28.3        | 23.9 $\pm$ 0.9            |
| Marcinkonys    | 187.1 $\pm$ 12.6  | 89.8 $\pm$ 1.3   | 96.1 $\pm$ 2.0   | 1584.3 $\pm$ 88.5  | 1051.9 $\pm$ 62.4        | 73.0 $\pm$ 2.7            |
| Šilainė        | 128.4 $\pm$ 7.5   | 65.5 $\pm$ 4.0   | 28.7 $\pm$ 1.6   | 514.5 $\pm$ 20.1   | 965.2 $\pm$ 26.3         | 39.0 $\pm$ 1.4            |
| Smėlynė        | 329.5 $\pm$ 13.5* | 182.7 $\pm$ 5.0  | 71.6 $\pm$ 0.5   | 873.4 $\pm$ 47.9   | 1579.1 $\pm$ 34.8        | 90.1 $\pm$ 2.0*           |
| Ilgalaukiai    | 132.0 $\pm$ 3.2   | 81.3 $\pm$ 7.5   | 90.4 $\pm$ 3.3   | 1621.4 $\pm$ 47.5  | 2005.9 $\pm$ 83.9        | 32.3 $\pm$ 0.6            |
| Vosniūnai      | 197.3 $\pm$ 9.6   | 100.9 $\pm$ 4.6  | 69.4 $\pm$ 2.3   | 855.2 $\pm$ 57.5   | 1288.5 $\pm$ 63.2        | 36.1 $\pm$ 0.2            |
| Kadagynai      | 175.8 $\pm$ 6.5   | 80.4 $\pm$ 3.3   | 58.9 $\pm$ 2.3   | 981.6 $\pm$ 13.4   | 1633.4 $\pm$ 34.7        | 30.8 $\pm$ 1.8            |
| Tolkūnai       | 293.5 $\pm$ 4.9   | 226.9 $\pm$ 5.5* | 49.3 $\pm$ 1.1   | 1607.3 $\pm$ 59.8  | 1948.8 $\pm$ 61.9        | 46.4 $\pm$ 0.2            |
| Bakūriškis     | NQ                | 28.3 $\pm$ 1.8   | 201.0 $\pm$ 2.3* | 2437.6 $\pm$ 12.8  | 2684.9 $\pm$ 12.1*       | 31.7 $\pm$ 1.0            |
| Šilinė         | 184.2 $\pm$ 9.9   | 69.4 $\pm$ 4.0   | 45.3 $\pm$ 1.5   | 578.1 $\pm$ 20.0   | 882.3 $\pm$ 26.6         | 37.8 $\pm$ 0.7            |
| Tyrelis        | 78.4 $\pm$ 1.4    | 54.1 $\pm$ 3.3   | 58.2 $\pm$ 2.1   | 710.5 $\pm$ 37.9   | 1226.4 $\pm$ 60.1        | 23.7 $\pm$ 0.8            |
| Pažemys        | 167.2 $\pm$ 5.0   | 119.5 $\pm$ 2.7  | 103.9 $\pm$ 3.7  | 1526.7 $\pm$ 31.4  | 2127.3 $\pm$ 46.0        | 79.7 $\pm$ 2.4            |

Results are presented as means  $\pm$  SD of the samples collected at different locations at the end of September 2019. Values marked with \* in the same column indicate the highest ( $p < 0.05$ ) amounts in samples. NQ—not quantified (amount below LOQ).

**Table S12.** Contents of quercetin glycosides ( $\mu\text{g/g DW} \pm \text{SD}$ ) in lingonberry leaves, collected at different locations.

| Location       | Rutin              | Hyperoside          | Isoquercitrin      | Reynoutrin        | Guaiaverin         | Avicularin          |
|----------------|--------------------|---------------------|--------------------|-------------------|--------------------|---------------------|
| Apūniškis      | 806.4 $\pm$ 57.0   | 2285.6 $\pm$ 136.3  | 714.3 $\pm$ 17.9   | 515.1 $\pm$ 16.8  | 1043.5 $\pm$ 16.9  | 2376.2 $\pm$ 69.0   |
| Plunksnuočiai  | 154.2 $\pm$ 11.4   | 213.3 $\pm$ 14.1    | 80.9 $\pm$ 4.6     | 76.5 $\pm$ 1.0    | 98.9 $\pm$ 6.7     | 351.9 $\pm$ 21.6    |
| Šakarva        | 595.1 $\pm$ 20.6   | 654.0 $\pm$ 18.4    | 234.0 $\pm$ 6.6    | 250.5 $\pm$ 7.0   | 295.2 $\pm$ 7.7    | 1067.6 $\pm$ 33.4   |
| Andrioniškis   | 964.4 $\pm$ 54.0   | 1037 $\pm$ 44.7     | 400.1 $\pm$ 25.3   | 388.0 $\pm$ 17.8  | 481.1 $\pm$ 19.6   | 1420.8 $\pm$ 6.7    |
| Jurgionys      | 974.8 $\pm$ 12.4   | 975.1 $\pm$ 27.6    | 549.6 $\pm$ 22.3   | 455.2 $\pm$ 9.6   | 491.6 $\pm$ 16.3   | 1327.3 $\pm$ 83.9   |
| Kernai         | 658.2 $\pm$ 22.2   | 665.1 $\pm$ 32.0    | 304.5 $\pm$ 18.2   | 227.8 $\pm$ 9.2   | 274.2 $\pm$ 8.3    | 906.1 $\pm$ 43.6    |
| Žadeikiai      | 73.0 $\pm$ 2.9     | 2136.8 $\pm$ 118.3  | 393.4 $\pm$ 24.3   | 460.7 $\pm$ 25.1  | 951.6 $\pm$ 55.3   | 1981.1 $\pm$ 38.7   |
| Galvokai       | 209.4 $\pm$ 12.1   | 2325.3 $\pm$ 92.3   | 470.8 $\pm$ 15.3   | 515.0 $\pm$ 25.6  | 1002.9 $\pm$ 28.9  | 2097.3 $\pm$ 57.0   |
| Giteniškė      | 525.2 $\pm$ 16.5   | 897.5 $\pm$ 15.5    | 326.4 $\pm$ 4.6    | 323.7 $\pm$ 23    | 370.6 $\pm$ 13.8   | 1279.1 $\pm$ 13.3   |
| Šalčininkėliai | 571.4 $\pm$ 1.3    | 1963.5 $\pm$ 36.6   | 513.8 $\pm$ 3.6    | 639.4 $\pm$ 14.8  | 1016.5 $\pm$ 14.4  | 2170.0 $\pm$ 49.3   |
| Bitėnai        | 402.7 $\pm$ 2.1    | 237.3 $\pm$ 4.6     | 144.6 $\pm$ 1.6    | 120.8 $\pm$ 2.3   | 101.5 $\pm$ 1.0    | 442.3 $\pm$ 5.3     |
| Pagramantis    | 746.5 $\pm$ 42.1   | 783.7 $\pm$ 42.8    | 389.6 $\pm$ 23.5   | 343.8 $\pm$ 18.3  | 320.8 $\pm$ 17.9   | 1087.2 $\pm$ 55.2   |
| Kūprė          | 63.3 $\pm$ 2.9     | 1773.9 $\pm$ 75.8   | 284.2 $\pm$ 5.2    | 528.7 $\pm$ 24.5  | 731.7 $\pm$ 3.2    | 2201.2 $\pm$ 36.1   |
| Bruknyė        | 734.3 $\pm$ 29.4   | 1973.8 $\pm$ 77.0   | 583.5 $\pm$ 19.0   | 663.9 $\pm$ 27.8  | 1022.9 $\pm$ 18.5  | 2234.1 $\pm$ 43.8   |
| Viršilai       | 15.4 $\pm$ 0.1     | 692.4 $\pm$ 51.2    | 110.6 $\pm$ 3.6    | 168.9 $\pm$ 9.1   | 376.1 $\pm$ 4.3    | 713.5 $\pm$ 18.5    |
| Labanoras (a)  | 1034.1 $\pm$ 1.5   | 998.7 $\pm$ 13.2    | 444.1 $\pm$ 3.0    | 539.4 $\pm$ 6.7   | 557.7 $\pm$ 5.6    | 1847.4 $\pm$ 15.7   |
| Labanoras (b)  | 889.0 $\pm$ 17.0   | 1924.9 $\pm$ 34.4   | 530.3 $\pm$ 30.6   | 594.3 $\pm$ 32.5  | 878.3 $\pm$ 14.5   | 2316.6 $\pm$ 117.8  |
| Komarinė       | 816.4 $\pm$ 43.6   | 947.4 $\pm$ 13.8    | 407.2 $\pm$ 11.4   | 385.7 $\pm$ 1.1   | 406.6 $\pm$ 30.0   | 1390.7 $\pm$ 20.1   |
| Marcinkonys    | 1474 $\pm$ 94.6    | 1684.1 $\pm$ 22.8   | 668.7 $\pm$ 37.7   | 512.6 $\pm$ 12.5  | 893.4 $\pm$ 2.8    | 1966.3 $\pm$ 70.7   |
| Šilainė        | 870.2 $\pm$ 44.7   | 1348.1 $\pm$ 36.9   | 409.6 $\pm$ 31.2   | 415.6 $\pm$ 16.8  | 619.0 $\pm$ 22.5   | 1671.7 $\pm$ 62.0   |
| Smėlynė        | 2136.4 $\pm$ 59.7* | 3409.7 $\pm$ 108.4* | 1241.3 $\pm$ 33.1* | 853.8 $\pm$ 39.3* | 1345.3 $\pm$ 37.1* | 3473.4 $\pm$ 136.6* |
| Ilgalaukiai    | 777.2 $\pm$ 14.0   | 717.9 $\pm$ 43.1    | 407.0 $\pm$ 7.8    | 319.6 $\pm$ 12.1  | 362.3 $\pm$ 15.3   | 1187.9 $\pm$ 42.0   |
| Vosniūnai      | 1674.3 $\pm$ 89.7  | 2062.1 $\pm$ 118.5  | 816.4 $\pm$ 44.6   | 494.5 $\pm$ 28.2  | 954.0 $\pm$ 55.6   | 2087.1 $\pm$ 112.2  |
| Kadagnai       | 1087.3 $\pm$ 82.4  | 958.0 $\pm$ 5.8     | 468.9 $\pm$ 37.5   | 397.6 $\pm$ 7.2   | 410.2 $\pm$ 34.0   | 1535.6 $\pm$ 42.5   |
| Tolkūnai       | 2094.3 $\pm$ 59.4* | 1691.5 $\pm$ 93.5   | 1298.0 $\pm$ 46.7* | 760.7 $\pm$ 2.5   | 1049.6 $\pm$ 26.0  | 2739.1 $\pm$ 45.4   |
| Bakūriškis     | 27.9 $\pm$ 2.2     | 2724.2 $\pm$ 48.5   | 420.7 $\pm$ 11.0   | 740.5 $\pm$ 29.7  | 1202.2 $\pm$ 27.4  | 2756.9 $\pm$ 74.3   |
| Šilinė         | 1346.6 $\pm$ 78.8  | 1124.4 $\pm$ 80.9   | 502.6 $\pm$ 4.4    | 334.0 $\pm$ 13.3  | 484.8 $\pm$ 19.6   | 1378.3 $\pm$ 61.4   |
| Tyrelis        | 627.7 $\pm$ 42.8   | 613.3 $\pm$ 21.6    | 327.1 $\pm$ 18.1   | 289.7 $\pm$ 9.3   | 263.8 $\pm$ 7.7    | 927.9 $\pm$ 34.7    |
| Pažemys        | 830.4 $\pm$ 21.8   | 2336.4 $\pm$ 38.4   | 638.8 $\pm$ 14.8   | 649.0 $\pm$ 11.5  | 1045.9 $\pm$ 35.3  | 2726.7 $\pm$ 56.4   |

Results are presented as means  $\pm$  SD of the samples collected at different locations at the end of September 2019. Values marked with \* in the same column indicate the highest ( $p < 0.05$ ) amounts in samples.

**Table S13.** Contents of triterpenoid acids and sterols ( $\mu\text{g/g DW}$ )  $\pm$  SD in lingonberry leaves, collected at different locations.

| Location       | Maslinic acid   | Corosolic acid   | Betulinic acid  | Oleanolic acid     | Ursolic acid       | $\beta$ -Sitosterol |
|----------------|-----------------|------------------|-----------------|--------------------|--------------------|---------------------|
| Apūniškis      | 26.8 $\pm$ 1.3  | 85.4 $\pm$ 2.4   | NQ              | 157.4 $\pm$ 2.7    | 912.2 $\pm$ 20.4   | 428.8 $\pm$ 12.1*   |
| Plunksnuočiai  | 23.6 $\pm$ 0.8  | 58.3 $\pm$ 2.1   | NQ              | 241.5 $\pm$ 0.7    | 947.0 $\pm$ 30.2   | 341.4 $\pm$ 12.3    |
| Šakarva        | 15.6 $\pm$ 0.2  | 77.7 $\pm$ 2.4   | 16.5 $\pm$ 0.3  | 287.5 $\pm$ 3.7    | 1247.8 $\pm$ 28.2  | 347.9 $\pm$ 2.9     |
| Andrioniškis   | 24.1 $\pm$ 1.5  | 79.8 $\pm$ 1.4   | 6.5 $\pm$ 0.6   | 215.3 $\pm$ 2.7    | 1132.1 $\pm$ 62.7  | 376.6 $\pm$ 9.6     |
| Jurgionys      | 12.1 $\pm$ 0.5  | 56.1 $\pm$ 0.6   | 20.3 $\pm$ 0.7  | 191.5 $\pm$ 4.0    | 957.4 $\pm$ 15.2   | 440.8 $\pm$ 3.9*    |
| Kernai         | 12.0 $\pm$ 0.5  | 74.7 $\pm$ 2.9   | NQ              | 235.3 $\pm$ 2.9    | 1197.6 $\pm$ 33.9  | 410.5 $\pm$ 0.3*    |
| Žadeikiai      | 26.4 $\pm$ 0.8  | 91.1 $\pm$ 2.7   | ND              | 277.7 $\pm$ 3.7    | 1220.8 $\pm$ 22.6  | 375.8 $\pm$ 9.4     |
| Galvokai       | 13.8 $\pm$ 0.2  | 67.1 $\pm$ 0.2   | ND              | 249.9 $\pm$ 5.4    | 1275.9 $\pm$ 33.0  | 393.8 $\pm$ 18.0    |
| Giteniškė      | 23.1 $\pm$ 1.3  | 47.8 $\pm$ 2.0   | 12.7 $\pm$ 0.1  | 168.0 $\pm$ 1.9    | 805.8 $\pm$ 10.7   | 321.5 $\pm$ 11.2    |
| Šalčininkėliai | 33.6 $\pm$ 1.6  | 71.4 $\pm$ 3.5   | NQ              | 229.3 $\pm$ 4.6    | 1158.0 $\pm$ 10.6  | 395.4 $\pm$ 11.6    |
| Bitėnai        | 9.1 $\pm$ 0.3   | 75.2 $\pm$ 2.8   | NQ              | 219.9 $\pm$ 6.2    | 1118.9 $\pm$ 8.6   | 285.8 $\pm$ 2.6     |
| Pagramantis    | 30.6 $\pm$ 1.1  | 84.6 $\pm$ 4.9   | ND              | 309.8 $\pm$ 14.5   | 1432.4 $\pm$ 72.4  | 346.8 $\pm$ 2.6     |
| Kūprė          | 29.4 $\pm$ 0.8  | 47.4 $\pm$ 1.8   | 17.0 $\pm$ 0.2  | 130.3 $\pm$ 2.2    | 580.3 $\pm$ 18.4   | 441.1 $\pm$ 2.5*    |
| Bruknynė       | 34.7 $\pm$ 0.2  | 74.3 $\pm$ 4.0   | ND              | 228.4 $\pm$ 3.7    | 1150.1 $\pm$ 24.1  | 410.1 $\pm$ 16.7*   |
| Viršilai       | 7.1 $\pm$ 0.1   | 38.2 $\pm$ 1.9   | NQ              | 212.8 $\pm$ 0.2    | 1078.8 $\pm$ 17.9  | 326.4 $\pm$ 12.2    |
| Labanoras (a)  | 62.8 $\pm$ 1.7* | 205.3 $\pm$ 4.7* | 84.3 $\pm$ 3.2* | 1333.6 $\pm$ 48.9* | 1626.3 $\pm$ 55.8* | 438.7 $\pm$ 13.0*   |
| Labanoras (b)  | 16.1 $\pm$ 0.1  | 50.2 $\pm$ 1.2   | 23.9 $\pm$ 1.9  | 364.3 $\pm$ 12.7   | 755.6 $\pm$ 21.5   | 373.0 $\pm$ 13.5    |
| Komarinė       | 22.7 $\pm$ 1.0  | 81.1 $\pm$ 3.5   | ND              | 309.5 $\pm$ 9.7    | 698.2 $\pm$ 35.6   | 330.5 $\pm$ 3.9     |
| Marcinkonys    | 33.7 $\pm$ 1.6  | 96.5 $\pm$ 2.5   | 16.3 $\pm$ 1.1  | 213.0 $\pm$ 2.5    | 867.8 $\pm$ 11.9   | 319.3 $\pm$ 15.7    |
| Šilainė        | 8.4 $\pm$ 0.1   | 51.3 $\pm$ 1.2   | 27.3 $\pm$ 0.7  | 158.1 $\pm$ 5.3    | 704.3 $\pm$ 36.9   | 314.7 $\pm$ 9.1     |
| Smėlynė        | 10.2 $\pm$ 0.6  | 50.4 $\pm$ 0.5   | 4.1 $\pm$ 0.5   | 201.2 $\pm$ 12.0   | 940.6 $\pm$ 4.1    | 391.3 $\pm$ 4.0     |
| Ilgalaukiai    | 12.6 $\pm$ 0.4  | 61.4 $\pm$ 1.0   | 3.6 $\pm$ 0.2   | 247.8 $\pm$ 12.8   | 1201.8 $\pm$ 62.7  | 302.0 $\pm$ 7.0     |
| Vosniūnai      | 7.1 $\pm$ 0.4   | 54.7 $\pm$ 3.3   | 40.7 $\pm$ 3.1  | 182.5 $\pm$ 2.5    | 814.8 $\pm$ 4.5    | 311.8 $\pm$ 16.2    |
| Kadagynai      | 11.4 $\pm$ 0.4  | 66.4 $\pm$ 3.5   | 36.3 $\pm$ 0.4  | 208.7 $\pm$ 6.9    | 789.2 $\pm$ 5.7    | 348.1 $\pm$ 19.5    |
| Tolkūnai       | 32.7 $\pm$ 0.9  | 172.0 $\pm$ 6.8  | 56.7 $\pm$ 1.6  | 269.4 $\pm$ 12.4   | 1265.0 $\pm$ 62.3  | 408.7 $\pm$ 6.0*    |
| Bakūriškis     | 8.6 $\pm$ 0.9   | 117.2 $\pm$ 5.1  | 30.7 $\pm$ 1.3  | 193.9 $\pm$ 2.6    | 904.5 $\pm$ 32.8   | 396.1 $\pm$ 3.1     |
| Šilinė         | 44.4 $\pm$ 1.4  | 193.1 $\pm$ 1.2* | 28.3 $\pm$ 1.4  | 237.3 $\pm$ 3.1    | 1118.0 $\pm$ 46.9  | 359.2 $\pm$ 17.1    |
| Tyrelis        | 16.8 $\pm$ 0.5  | 89.7 $\pm$ 2.8   | ND              | 263.5 $\pm$ 14.5   | 1265.7 $\pm$ 15.6  | 346.7 $\pm$ 10.8    |
| Pažemys        | 17.2 $\pm$ 0.1  | 91.2 $\pm$ 0.5   | 20.8 $\pm$ 1.4  | 361.4 $\pm$ 16.8   | 832.9 $\pm$ 13.2   | 379.5 $\pm$ 13.9    |

Results are presented as means  $\pm$  SD of the samples collected at different locations at the end of September 2019. Values marked with \* in the same column indicate the highest ( $p < 0.05$ ) amounts in samples. ND—not detected, NQ—not quantified (amount below LOQ).

**Table S14.** Contents of neutral triterpenoids ( $\mu\text{g/g DW} \pm \text{SD}$ ) in lingonberry leaves, collected at different locations.

| Location       | Betulin           | Erythrodiol      | Uvaol            | Lupeol             | $\alpha$ -Amyrin    | $\beta$ -Amyrin    | Friedelin          |
|----------------|-------------------|------------------|------------------|--------------------|---------------------|--------------------|--------------------|
| Apūniškis      | 128.7 $\pm$ 4.0   | 30.8 $\pm$ 1.2   | 136.2 $\pm$ 3.5  | 157.3 $\pm$ 3.0    | 2145.4 $\pm$ 14.5   | 148.5 $\pm$ 5.4    | 172.7 $\pm$ 7.0    |
| Plunksnuočiai  | 148.8 $\pm$ 6.7   | 52.8 $\pm$ 1.0   | 102.6 $\pm$ 2.0  | 445.7 $\pm$ 5.8    | 677.3 $\pm$ 14.9    | 1349.9 $\pm$ 67.0* | 80.5 $\pm$ 3.3     |
| Šakarva        | 120.4 $\pm$ 0.5   | 41.6 $\pm$ 1.3   | 165.7 $\pm$ 1.2  | 852.5 $\pm$ 25.7   | 742.8 $\pm$ 15.7    | 1058.4 $\pm$ 18.0  | 54.0 $\pm$ 2.2     |
| Andrioniškis   | 186.3 $\pm$ 0.6   | 39.0 $\pm$ 1.8   | 190 $\pm$ 6.8    | 398.9 $\pm$ 1.2    | 1462.1 $\pm$ 24.1   | 131.9 $\pm$ 5.4    | 505.8 $\pm$ 13.1   |
| Jurgionys      | 227.0 $\pm$ 5.5   | 57.3 $\pm$ 1.5   | 183.2 $\pm$ 1.3  | 1142.3 $\pm$ 6.6   | 1034.7 $\pm$ 23.7   | 101.2 $\pm$ 0.7    | 251.1 $\pm$ 11.8   |
| Kernai         | 293.4 $\pm$ 5.3   | 31.0 $\pm$ 0.3   | 123.5 $\pm$ 7.0  | 526.8 $\pm$ 16.0   | 963.7 $\pm$ 4.1     | 224.4 $\pm$ 11.0   | 2020.2 $\pm$ 19.5* |
| Žadeikiai      | 315.7 $\pm$ 12.3* | 101.7 $\pm$ 5.4  | 328.6 $\pm$ 6.9  | 173.4 $\pm$ 8.4    | 2303.3 $\pm$ 75.1   | 155.5 $\pm$ 5.7    | 234.5 $\pm$ 12.0   |
| Galvokai       | 275.8 $\pm$ 9.5   | 92.2 $\pm$ 1.9   | 129.6 $\pm$ 3.8  | 210.8 $\pm$ 2.0    | 3266.1 $\pm$ 123.5* | 224.3 $\pm$ 3.0    | 217.1 $\pm$ 4.5    |
| Giteniškė      | 182.4 $\pm$ 1.7   | 35.9 $\pm$ 0.7   | 51.9 $\pm$ 1.7   | 1489.4 $\pm$ 23.8  | 819.6 $\pm$ 30.6    | 120.3 $\pm$ 0.1    | 127.9 $\pm$ 5.4    |
| Šalčininkėliai | 280.2 $\pm$ 0.4   | 45.1 $\pm$ 2.2   | 150.2 $\pm$ 2.5  | 346.1 $\pm$ 18.6   | 1285.9 $\pm$ 7.6    | 160.5 $\pm$ 4.3    | 620.7 $\pm$ 4.6    |
| Bitėnai        | 123.9 $\pm$ 5.5   | 26.2 $\pm$ 1.5   | 81.7 $\pm$ 3.8   | 696.1 $\pm$ 27.3   | 1018.2 $\pm$ 22.1   | 197.7 $\pm$ 1.6    | 1255.0 $\pm$ 17.0  |
| Pagramantis    | 212.1 $\pm$ 7.6   | 52.7 $\pm$ 1.5   | 124.4 $\pm$ 6.8  | 152.8 $\pm$ 6.5    | 1698.6 $\pm$ 54.7   | 267.9 $\pm$ 7.4    | 195.5 $\pm$ 8.4    |
| Kūprė          | 248.9 $\pm$ 0.4   | 96.2 $\pm$ 5.1   | 67.7 $\pm$ 0.6   | 144.8 $\pm$ 8.3    | 857.6 $\pm$ 16.3    | 93.7 $\pm$ 3.1     | 183.1 $\pm$ 4.0    |
| Bruknynė       | 298.5 $\pm$ 3.5   | 50.0 $\pm$ 1.8   | 149.4 $\pm$ 8.4  | 569.5 $\pm$ 3.9    | 1294.7 $\pm$ 9.6    | 135.0 $\pm$ 3.0    | 457.8 $\pm$ 10.7   |
| Viršilai       | 128.4 $\pm$ 5.6   | 24.4 $\pm$ 1.8   | 81.2 $\pm$ 1.2   | 220.3 $\pm$ 10.9   | 1663.1 $\pm$ 53.2   | 244.1 $\pm$ 10.8   | 115.8 $\pm$ 4.0    |
| Labanoras (a)  | 218.4 $\pm$ 1.8   | 306.4 $\pm$ 7.8* | 437.8 $\pm$ 9.7* | 1103.0 $\pm$ 55.7  | 3249.3 $\pm$ 41.3*  | 1175.5 $\pm$ 7.0   | 244.7 $\pm$ 8.3    |
| Labanoras (b)  | 107.0 $\pm$ 3.9   | 64.1 $\pm$ 2.0   | 221.8 $\pm$ 0.2  | 869.5 $\pm$ 22.1   | 1287.7 $\pm$ 28.9   | 492.6 $\pm$ 23.3   | 324.2 $\pm$ 15.8   |
| Komarinė       | 154.7 $\pm$ 3.0   | 67.9 $\pm$ 3.9   | 100.5 $\pm$ 4.2  | 318.8 $\pm$ 7.8    | 1268.0 $\pm$ 14.7   | 957.4 $\pm$ 38.7   | 186.4 $\pm$ 7.0    |
| Marcinkonys    | 137.1 $\pm$ 0.7   | 31.1 $\pm$ 2.0   | 145.9 $\pm$ 4.6  | 591.7 $\pm$ 19.4   | 1743.7 $\pm$ 46.2   | 427.5 $\pm$ 4.0    | 288.1 $\pm$ 12.2   |
| Šilainė        | 237.1 $\pm$ 4.2   | 17.5 $\pm$ 0.4   | 72.8 $\pm$ 3.7   | 1933.5 $\pm$ 19.1* | 1123.8 $\pm$ 39.8   | 155.4 $\pm$ 1.0    | 82.7 $\pm$ 3.7     |
| Smėlynė        | 171.7 $\pm$ 6.6   | 13.3 $\pm$ 1.1   | 95.0 $\pm$ 3.3   | 851.5 $\pm$ 14.4   | 2024.7 $\pm$ 37.8   | 148.1 $\pm$ 5.9    | 190.5 $\pm$ 4.3    |
| Ilgalaukiai    | 170.1 $\pm$ 5.4   | 16.4 $\pm$ 0.2   | 100.8 $\pm$ 3.3  | 527.5 $\pm$ 7.5    | 1055.9 $\pm$ 44.7   | 139.1 $\pm$ 5.2    | 686.9 $\pm$ 23.0   |
| Vosniūnai      | 110.8 $\pm$ 2.2   | 29.4 $\pm$ 1.0   | 127.1 $\pm$ 0.8  | 183.2 $\pm$ 4.1    | 1715.4 $\pm$ 28.8   | 121.3 $\pm$ 4.1    | 196.9 $\pm$ 8.9    |
| Kadagnai       | 162.3 $\pm$ 6.6   | 20.3 $\pm$ 0.6   | 47.9 $\pm$ 1.8   | 592.1 $\pm$ 10.6   | 1147.5 $\pm$ 57.5   | 339.8 $\pm$ 1.9    | 148.1 $\pm$ 0.8    |
| Tolkūnai       | 146.5 $\pm$ 3.0   | 38.3 $\pm$ 1.1   | 152.2 $\pm$ 2.6  | 141.1 $\pm$ 6.2    | 2556.0 $\pm$ 57.8   | 112.9 $\pm$ 6.4    | 166.1 $\pm$ 5.8    |
| Bakūriškis     | 223.8 $\pm$ 8.3   | 16.4 $\pm$ 1.1   | 69.9 $\pm$ 1.8   | 239.0 $\pm$ 9.5    | 2084.8 $\pm$ 76.1   | 116.3 $\pm$ 2.7    | 268.1 $\pm$ 3.9    |
| Šilinė         | 276.7 $\pm$ 9.4   | 25.5 $\pm$ 1.6   | 62.0 $\pm$ 3.5   | 1232.6 $\pm$ 12.3  | 1104.8 $\pm$ 23.8   | 113.1 $\pm$ 4.6    | 1891.8 $\pm$ 49.4  |
| Tyrelis        | 216.6 $\pm$ 2.6   | 22.9 $\pm$ 0.9   | 63.3 $\pm$ 1.7   | 189.7 $\pm$ 3.1    | 1699.2 $\pm$ 45.6   | 267.4 $\pm$ 6.1    | 272.7 $\pm$ 13.2   |
| Pažemys        | 325.0 $\pm$ 16.4* | 64.7 $\pm$ 2.7   | 69.5 $\pm$ 0.3   | 645.6 $\pm$ 1.3    | 978.9 $\pm$ 44.5    | 994.7 $\pm$ 14.1   | 368.1 $\pm$ 1.8    |

Results are presented as means  $\pm$  SD of the samples collected at different locations at the end of September 2019. Values marked with \* in the same column indicate the highest ( $p < 0.05$ ) amounts in samples.

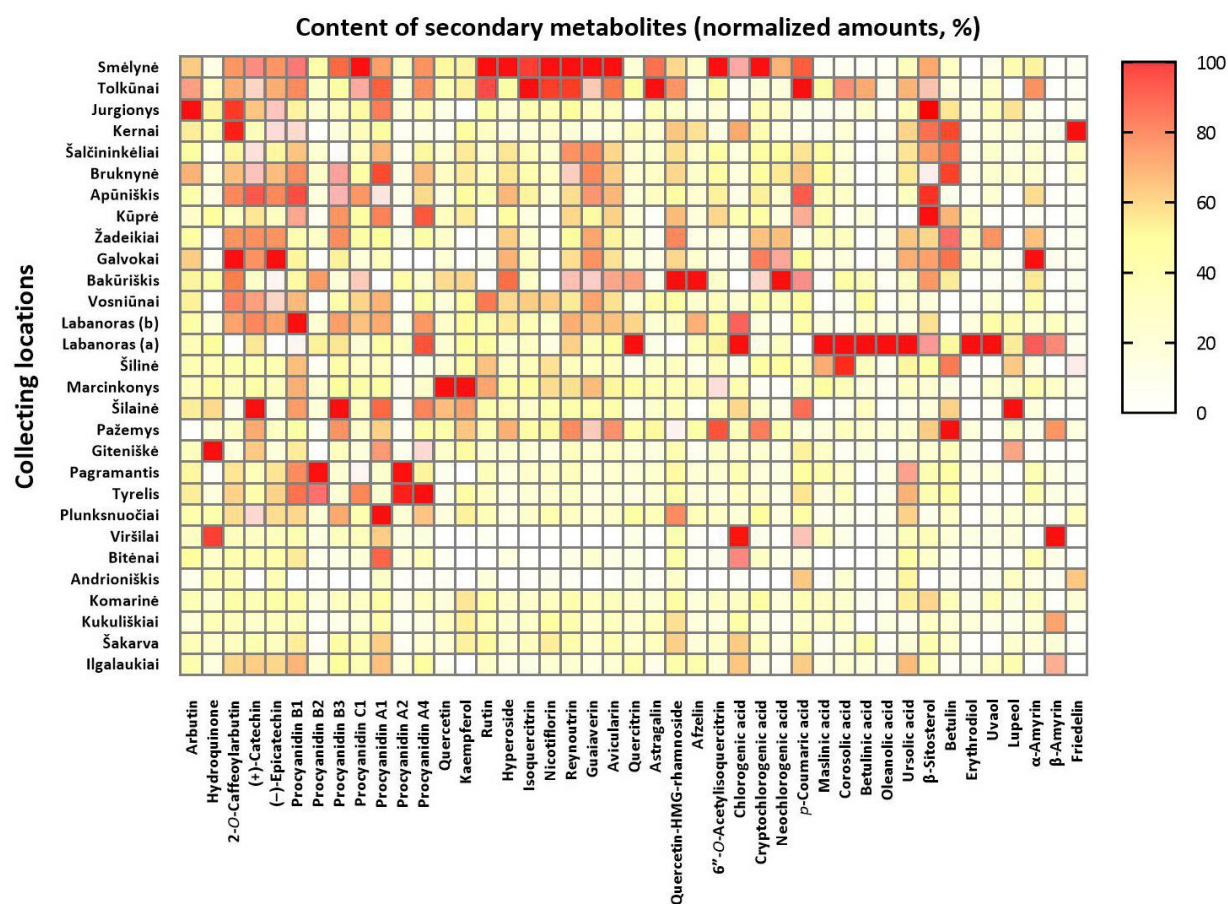

**Figure S2.** Heatmap estimating contents of phenolic and triterpenic compounds in lingonberry leaves based on their collecting locations.



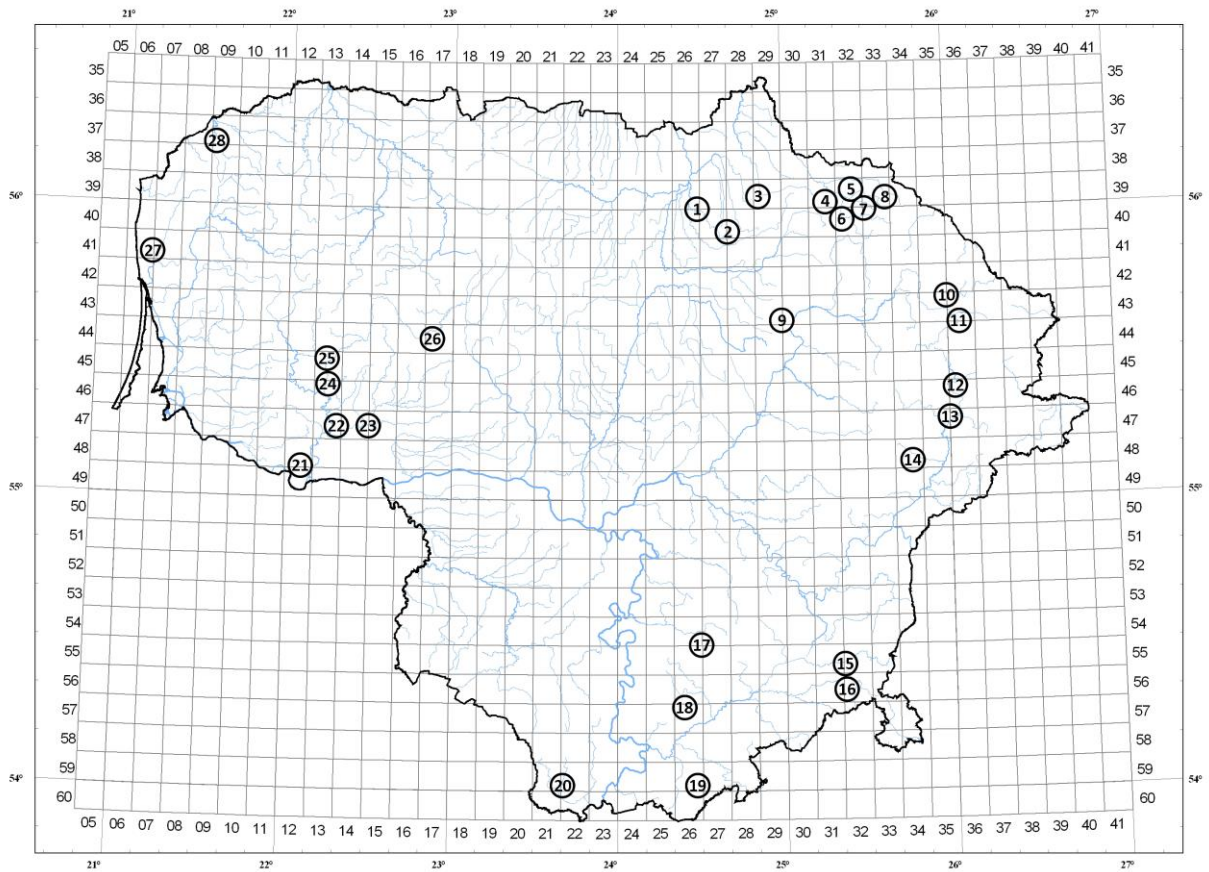

**Figure S3.** Collecting locations of lingonberry leaves samples in Lithuania: (1) Žadeikiai, (2) Vosniūnai, (3) Galvokai, (4) Viršilai, (5) Plunksnuočiai, (6) Ilgalaukiai, (7) Apūniškis, (8) Bakūriškis, (9) Andrioniškis, (10) Pažemys, (11) Giteniškę, (12) Smėlynė, (13) Šakarva, (14) Labanoras (a, b), (15) Šalčininkėliai, (16) Bruknyne, (17) Jurgionys, (18) Tolkūnai, (19) Marcinkonys, (20) Šilainė, (21) Bitėnai, (22) Šilinė, (23) Komarinė, (24) Pagramantis, (25) Tyrelis, (26) Kūprė, (27) Kukuliškiai, (28) Kernai.

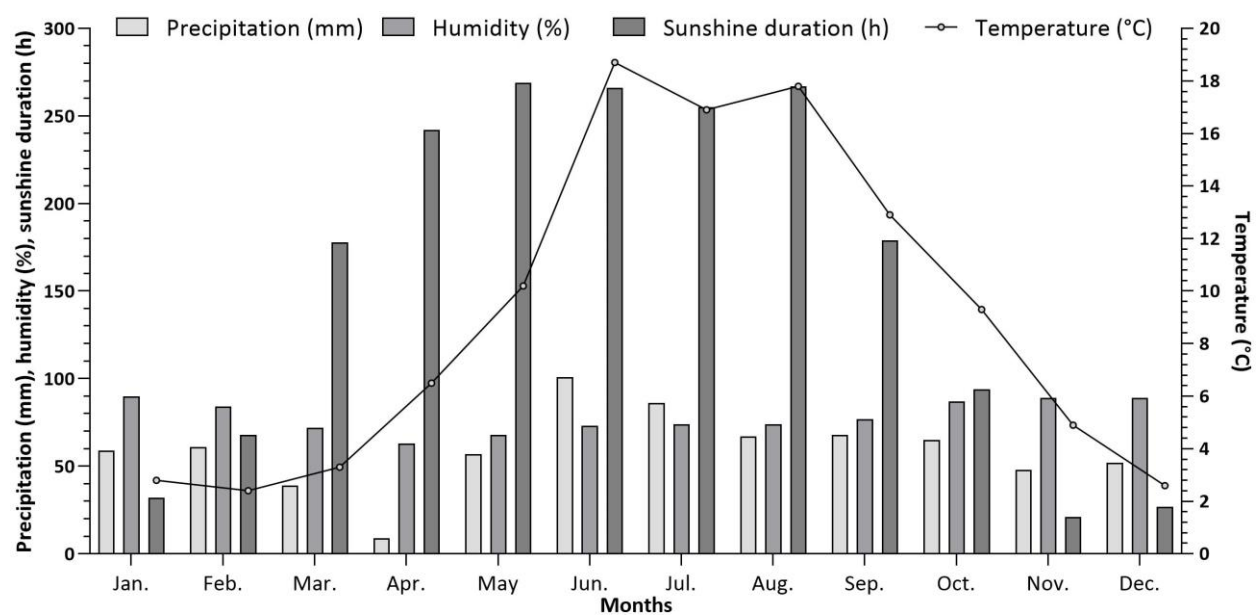

**Figure S4.** Dynamics of meteorological factors during one year testing period in Lithuania.
